# Supplementary material for: Adherence to Oral Antidiabetic Drugs in Patients with Type 2 Diabetes: Systematic Review and Meta-Analysis
Source: J Clin Med. 2023 Mar 2;12(5):1981. doi: 10.3390/jcm12051981 (PMC10004070; doi:10.3390/jcm12051981)

## Supplementary Material S1. Search strategy

### MEDLINE (via Pubmed)

*((T2DM OR (type AND 2 AND diabetes) OR (diabetes AND mellitus) OR diabetes OR (type AND 2 AND diabetes AND mellitus)) AND (adherence OR compliance) AND ((antidiabetic AND (agent\* OR drug\*)) OR (glucose AND lowering AND (agent\* OR drug\*)) OR (antihyperglycemic AND (agent\* OR drug\*)) OR tolbutamide OR chlorpropamide OR glibenclamide OR glimepiride OR glipizide OR gliclazide OR gliquidone OR repaglinide OR nateglinide OR mitiglinide OR pioglitazone OR semaglutide OR vildagliptin OR sitagliptin OR saxagliptin OR linagliptin OR alogliptin OR metformin OR dapagliflozin OR canagliflozin OR empagliflozin OR sulphonylurea\* OR thiazolidindione\* OR glitazone\* OR (GLP-1 AND receptor AND agonist\*) OR (DPP-4 AND inhibitor\*) OR gliptin\* OR (SGLT2 AND inhibitor\*))*

### Scopus

*( TITLE-ABS-KEY ( t2dm ) OR TITLE-ABS-KEY ( type AND 2 AND diabetes ) OR TITLE-ABS-KEY ( diabetes AND mellitus ) OR TITLE-ABS-KEY ( diabetes ) OR TITLE-ABS-KEY ( type AND 2 AND diabetes AND mellitus ) AND TITLE-ABS-KEY ( adherence ) OR TITLE-ABS-KEY ( compliance ) AND TITLE-ABS-KEY ( antidiabetic AND agent\* OR drug\* ) OR TITLE-ABS-KEY ( glucose AND lowering AND agent\* OR drug\* ) OR TITLE-ABS-KEY ( antihyperglycemic AND agent\* OR drug\* ) OR TITLE-ABS-KEY ( tolbutamide OR chlorpropamide OR glibenclamide OR glimepiride OR glipizide OR gliclazide OR gliquidone OR repaglinide OR nateglinide OR mitiglinide OR pioglitazone ) OR TITLE-ABS-KEY ( semaglutide OR vildagliptin OR sitagliptin OR saxagliptin OR linagliptin OR alogliptin OR metformin ) OR TITLE-ABS-KEY ( dapagliflozin OR canagliflozin OR empagliflozin OR sulphonylurea\* OR thiazolidindione\* OR glitazone\* ) OR TITLE-ABS-KEY ( glp-1 AND receptor AND agonist\* ) OR TITLE-ABS-KEY ( ddp-4 AND inhibitor\* ) OR TITLE-ABS-KEY ( gliptin\* ) OR TITLE-ABS-KEY ( sglt2 AND inhibitor\* ) ) AND ( LIMIT-TO ( DOCTYPE , "ar" ) ) AND ( LIMIT-TO ( LANGUAGE , "English" ) )*

### CENTRAL (via the Cochrane Library)

| ID  | Search                                                     |
|-----|------------------------------------------------------------|
| #1  | ("T2DM"):ti,ab,kw                                          |
| #2  | (type):ti,ab,kw AND (2):ti,ab,kw AND ("diabetes"):ti,ab,kw |
| #3  | ("diabetes"):ti,ab,kw AND (mellitus):ti,ab,kw              |
| #4  | #1 OR #2                                                   |
| #5  | ("diabetes"):ti,ab,kw                                      |
| #6  | (mellitus):ti,ab,kw                                        |
| #7  | #2 AND #6                                                  |
| #8  | #4 OR #3 OR #5 OR #7                                       |
| #9  | ("adherence"):ti,ab,kw                                     |
| #10 | ("compliance"):ti,ab,kw                                    |
| #11 | #9 OR #10                                                  |
| #12 | ("antidiabetic"):ti,ab,kw                                  |
| #13 | ("drug"):ti,ab,kw                                          |
| #14 | (agent):ti,ab,kw                                           |
| #15 | #13 OR #14                                                 |
| #16 | #12 AND #15                                                |
| #17 | (glucose):ti,ab,kw                                         |
| #18 | ("lowering"):ti,ab,kw                                      |
| #19 | ("antihyperglycemic"):ti,ab,kw                             |
| #20 | #15 AND #17 AND #18                                        |
| #21 | #15 AND #19                                                |
| #22 | ("tolbutamide"):ti,ab,kw                                   |
| #23 | ("chlorpropamide"):ti,ab,kw                                |
| #24 | ("glibenclamide"):ti,ab,kw                                 |
| #25 | ("glimepiride"):ti,ab,kw                                   |
| #26 | ("glipizide"):ti,ab,kw                                     |
| #27 | ("Gliclazide"):ti,ab,kw                                    |
| #28 | ("gliquidone"):ti,ab,kw                                    |
| #29 | ("repaglinide"):ti,ab,kw                                   |
| #30 | ("nateglinide"):ti,ab,kw                                   |
| #31 | ("mitiglinide"):ti,ab,kw                                   |
| #32 | ("pioglitazone"):ti,ab,kw                                  |

#33 (semaglutide):ti,ab,kw  
#34 (vildagliptin):ti,ab,kw  
#35 ("sitagliptin"):ti,ab,kw  
#36 (saxagliptin):ti,ab,kw  
#37 (linagliptin):ti,ab,kw  
#38 (alogliptin):ti,ab,kw  
#39 ("metformin"):ti,ab,kw  
#40 (dapagliflozin):ti,ab,kw  
#41 (canagliflozin):ti,ab,kw  
#42 (empagliflozin):ti,ab,kw  
#43 ("sulphonylurea"):ti,ab,kw  
#44 ("thiazolidinedione"):ti,ab,kw  
#45 ("glitazone"):ti,ab,kw  
#46 ("GLP-1"):ti,ab,kw AND ("receptor"):ti,ab,kw AND (agonist):ti,ab,kw  
#47 ("DPP-IV"):ti,ab,kw AND ("inhibitor"):ti,ab,kw  
#48 (gliptin):ti,ab,kw  
#49 ("SGLT 2"):ti,ab,kw AND ("inhibitor"):ti,ab,kw  
#50 #16 OR #20 OR #21 OR #22 OR #23 OR #24 OR #25 OR #26 OR #27 OR #28 OR #29 OR #30 OR #31 OR #32 OR #33 OR #34 OR #35 OR #36  
OR #37 OR #38 OR #39 OR #40 OR #41 OR #42 OR #43 OR #44 OR #45 OR #46 OR #47 OR #48 OR #49  
#51 #8 AND #11 AND #50

**Table S1. Characteristics of studies included in the systematic review**

| Study name        | Study design    | Data collection     | Age in years, mean $\pm$ SD (range) | Men, % | Continent | Study population                                                                                                                         | Definition of adherent patients                                                                                                                   | Included in the subgroup analysis |
|-------------------|-----------------|---------------------|-------------------------------------|--------|-----------|------------------------------------------------------------------------------------------------------------------------------------------|---------------------------------------------------------------------------------------------------------------------------------------------------|-----------------------------------|
| Abdullah, 2019    | Cross-sectional | Questionnaire       | (41-64)                             | 46.6   | Asia      | Adult patients with T2D                                                                                                                  | Score $\geq 27$ in the MCQ questionnaire                                                                                                          | Yes (a,d)                         |
| Acharya, 2019     | Cross-sectional | Questionnaire       | 49.8 $\pm$ 10.5                     | 37.0   | Asia      | Adult patients with T2D                                                                                                                  | Score $> 8$ in the MMAS-8 scale                                                                                                                   | Yes (a,d)                         |
| Adisa, 2013       | Cross-sectional | Questionnaire       | 60.2 $\pm$ 10.2                     | 38.6   | Africa    | Adult patients with T2D                                                                                                                  | Score $< 1$ in the MMAPS scale                                                                                                                    | Yes (a,d)                         |
| Aditama, 2019     | Cross-sectional | Questionnaire       | 45 (range unknown)                  | 20.0   | Asia      | Adult patients with T2D                                                                                                                  | Mean score =1 in a 21-item questionnaire                                                                                                          | Yes (a)                           |
| Afaya, 2020       | Cross-sectional | Questionnaire       | 57.5 $\pm$ 11.8                     | 31.8   | Africa    | Adult patients with T2D                                                                                                                  | Score 6-8 in the MAQ questionnaire                                                                                                                | Yes (a,d)                         |
| Ahmad, 2013       | Cross-sectional | Questionnaire       | 56.0 $\pm$ 9.1                      | 36.8   | Asia      | Adult patients with T2D                                                                                                                  | Score $> 27$ in the MCQ questionnaire                                                                                                             | Yes (a,d)                         |
| Aloudah, 2018     | Cross-sectional | Questionnaire       | 57.8 $\pm$ 8.7                      | 59.7   | Asia      | Adult patients with T2D                                                                                                                  | Score =8 in the MMAS-8 questionnaire                                                                                                              | Yes (a,b)                         |
| AlQarni, 2019     | Cross-sectional | Questionnaire       | 44.2 $\pm$ 15.6                     | 67.0   | Asia      | Adult patients with T2D                                                                                                                  | Score 30-33 in the GMAS scale                                                                                                                     | Yes (a,b)                         |
| Aminde, 2019      | Cross-sectional | Questionnaire       | 56.8 $\pm$ 2.7                      | 29.9   | Africa    | Adult patients with T2D                                                                                                                  | Score $\geq 27$ in the MCQ questionnaire                                                                                                          | Yes (a,d)                         |
| An, 2014          | Cohort study    | Administrative data | 58.7 $\pm$ 9.3                      | 61.7   | Asia      | Adult patients with T2D                                                                                                                  | “MPR $\geq 90\%$ , calculated as % of total days’ supply of medication/number of days in the evaluation period”                                   | Yes (a,d)                         |
| Andanalusia, 2019 | Cross-sectional | Questionnaire       | 55.0 $\pm$ 9.8                      | 28.3   | Asia      | Adult patients with diabetes                                                                                                             | Score =12 in the ARMS scale                                                                                                                       | Yes (a)                           |
| Arulmozhi, 2014   | Cross-sectional | Questionnaire       | 54.0 $\pm$ 12.0                     | 50.0   | Asia      | Adult patients with T2D                                                                                                                  | Score =8 in the MMAS-8 questionnaire                                                                                                              | Yes (a,d)                         |
| Ashur, 2015       | Cross-sectional | Questionnaire       | 54.4 $\pm$ 10.0                     | 41.1   | Africa    | Adult patients with T2D                                                                                                                  | Score $\geq 6$ in the MMAS-8 questionnaire                                                                                                        | Yes (a,d)                         |
| Ayoub, 2019       | Cross-sectional | Questionnaire       | 59.2 $\pm$ 10.7                     | 40.2   | Asia      | Adult patients with T2D                                                                                                                  | Score $\geq 38$ in the LMAS-14 scale                                                                                                              | Yes (a,f)                         |
| Balkhi, 2019      | Cross-sectional | Administrative data | 58.2 $\pm$ 10.8                     | 37.7   | Asia      | Adult patients with T2D                                                                                                                  | “Modified MPR (mMPR) $\geq 80\%$ , calculated as % of total days’ supply for all OADs fills/number of days covered in the follow-up period”       | Yes (a,b,f)                       |
| Basak, 2014       | Cohort study    | Administrative data | 53.9 $\pm$ 6.7                      | 55.5   | America   | Adult patients with T2D                                                                                                                  | “PDC $\geq 80\%$ , calculated by proportion of days on medications out of all days until the end of each quarter of observation period”           | Yes (a,d)                         |
| Bell, 2017        | Cohort study    | Administrative data | 54.3 $\pm$ 9.6                      | 53.7   | America   | Adult patients with T2D who had newly initiated treatment with an SGLT-2i or a sulfonylurea during the follow-up period (incident users) | “PDC $\geq 80\%$ , calculated by dividing the number of days the patient was “covered” by the medication during the follow-up period by 180 days” | Yes (a,c,e)                       |
| Benzaravy, 2019   | Cross-sectional | Questionnaire       | 56.4 $\pm$ 12.0                     | 32.1   | Asia      | Adult patients with T2D                                                                                                                  | Score $\geq 6$ in the MMAS-8 questionnaire                                                                                                        | Yes (a)                           |
| Bloomgarden, 2017 | Cohort study    | Administrative data | 56.3 $\pm$ 0.07                     | 54.6   | America   | Adult patients with T2D                                                                                                                  | “PDC $\geq 80\%$ , calculated as number of days with drug supplied divided for the follow-up period”                                              | Yes (a,d)                         |
| Bonger, 2018      | Cross-sectional | Questionnaire       | 51.1 $\pm$ 10.6                     | 43.3   | Africa    | Adult patients with T2D                                                                                                                  | Percent score $\geq 60\%$ in a structured and pretested questionnaire                                                                             | Yes (a,d)                         |
| Bruce, 2015       | Cross-sectional | Questionnaire       | (18-75)                             | 47.5   | Africa    | Adult patients with T2D                                                                                                                  | Score $\geq 3$ in the MMAS-4 questionnaire                                                                                                        | Yes (a)                           |

|                |                 |                     |                    |      |         |                                                                                                                                                       |                                                                                                                                                                     |               |
|----------------|-----------------|---------------------|--------------------|------|---------|-------------------------------------------------------------------------------------------------------------------------------------------------------|---------------------------------------------------------------------------------------------------------------------------------------------------------------------|---------------|
| Bryson, 2013   | Cohort study    | Administrative data | 67.9 ± 11.0        | 97.9 | America | Adult patients with diabetes                                                                                                                          | PDC ≥ 80%                                                                                                                                                           | Yes (a)       |
| Buysman, 2017  | Cohort study    | Administrative data | 55.6 ± 9.4         | 59.4 | America | Adult patients with T2D without use of any SGLT-2 inhibitor 12 months prior to the index date (incident users)                                        | “PDC ≥ 80%, calculated as the number of days that drug was available divided by the length of the follow-up period”                                                 | Yes (a,b,c,e) |
| Cai, 2016      | Cohort study    | Administrative data | 54.3 ± 2.5         | 57.1 | America | Adult patients with T2D whose first pharmacy claim for a newer OAD was during the inclusion period (incident users)                                   | “PDC ≥ 80%, calculated as number of days covered by pharmacy claims for the index agents divided by 360 days”                                                       | Yes (a,c,e)   |
| Cai, 2017      | Cohort study    | Administrative data | 55.0 ± 9.1         | 56.0 | America | Adult patients with T2D newly initiating SGLT-2 inhibitors, GLP-1 receptor agonists, or DPP-4 inhibitors during the inclusion period (incident users) | “PDC ≥ 80%, calculated as number of days the index drug was available or ‘covered’ divided by 360 days”                                                             | Yes (a,c,d,e) |
| Carls, 2017a   | Cohort study    | Administrative data | 62.5 ± 0.7         | 58.0 | America | Adult patients with T2D newly initiating antihyperglycemic drugs during the inclusion period (incident users)                                         | PDC ≥ 80%                                                                                                                                                           | Yes (a,c,e)   |
| Carls, 2017b   | Cohort study    | Administrative data | 63.0 ± 0.5         | 54.8 | America | Adult patients with T2D initiating OAD therapy during the inclusion period (incident users)                                                           | PDC ≥ 80%                                                                                                                                                           | Yes (a,c,e)   |
| Chang, 2015    | Cohort study    | Administrative data | 56.5 ± 11.6        | 52.1 | Asia    | Adult patients with T2D                                                                                                                               | “MPR ≥ 80%, calculated as the ratio of the number of days of prescribed medication divided by the total number of days in each study year”                          | Yes (a)       |
| Chen, 2013     | Cohort study    | Administrative data | 55.7 ± 11.3        | 52.5 | Asia    | Newly diagnosed adult patients with T2D initiating OAD therapy (incident users)                                                                       | “MPR between 80% and 120%, calculated as ratio of the total days with a supply of a prescribed medication divided by follow-up period”                              | Yes (a,e)     |
| Chen, 2016     | Cohort study    | Administrative data | 55.6 ± 11.3        | 52.8 | Asia    | Adult patients with T2D without T2D-related claims over the 3 years before the index date (incident users)                                            | “MPR ≥ 80%, calculated as ratio of the number of days of medications supplied divided by the total number of days in each study year”                               | Yes (a,e)     |
| Cheng, 2013    | Cohort study    | Administrative data | 55.6 ± 11.3        | 53.0 | Asia    | Adult patients with newly diagnosed T2D, without T2D-related claims over the 3 years before the index date (incident users)                           | “MPR ≥ 80%, calculated by dividing total number of days for which medication was prescribed by the number of days in a year”                                        | Yes (a,e)     |
| Chepulis, 2020 | Cohort study    | Administrative data | 65.0 ± 8.6         | 55.5 | Oceania | Patients with T2D                                                                                                                                     | “MPR ≥ 80%, calculated by summing the days of medication supply from the first to the last prescription divided by total number of days of the prescription period” | Yes (a,b,c,d) |
| Chew, 2015     | Cross-sectional | Questionnaire       | 56.9 ± 10.2        | 46.0 | Asia    | Adult patients with T2D                                                                                                                               | Score ≥ 6 in the MMAS-8 questionnaire                                                                                                                               | Yes (a,d)     |
| Chong, 2014    | Cohort study    | Administrative data | 57 (range unknown) | 54.3 | America | Patients with T2D                                                                                                                                     | “PDC ≥ 80%, calculated as ratio between number of days’ supply of medication in the index period and number of days in the study period”                            | Yes (a,c)     |
| de Vries, 2014 | Cross-sectional | Questionnaire       | 65.8 ± 9.5         | 55.3 | Europe  | Adult patients with T2D                                                                                                                               | Score > 20 in the MARS scale                                                                                                                                        | Yes (a)       |

|                |                 |                     |             |      |         |                                                                                                                                                  |                                                                                                                                                                                                             |                 |
|----------------|-----------------|---------------------|-------------|------|---------|--------------------------------------------------------------------------------------------------------------------------------------------------|-------------------------------------------------------------------------------------------------------------------------------------------------------------------------------------------------------------|-----------------|
| Degefa, 2020   | Cohort study    | Verbal interview    | 51.7 ± 12.2 | 50.7 | Africa  | Adult patients with T2D                                                                                                                          | “Receiving at least 80% of antidiabetic medications as per prescribed frequency and dose in the last 7 days”                                                                                                | Yes (a)         |
| Dossa, 2015    | Cohort study    | Administrative data | (55-74)     | 47.8 | America | Adult patients with T2D who newly use OADs, without claims of an OAD in the 1-year period before the OAD initiation date (incident users)        | “PDC ≥80%, calculated as total number of days covered by either any oral antidiabetic drug, divided by 365 days”                                                                                            | Yes (a)         |
| Elsous, 2017   | Cross-sectional | Questionnaire       | 56.4 ± 10.4 | 44.2 | Asia    | Patients with T2D                                                                                                                                | Score =4 in the MMAS-4 questionnaire                                                                                                                                                                        | Yes (a,d)       |
| Fai, 2017      | Cross-sectional | Questionnaire       | (35-64)     | /    | America | Adult patients with T2D                                                                                                                          | Score =8 in the MMAS-8 questionnaire                                                                                                                                                                        | Yes (a)         |
| Farmer, 2016   | Cohort study    | Administrative data | 64.2 ± 0.7  | 63.8 | Europe  | Adult patients with T2D who were newly-prescribed metformin, sulfonylureas, thiazolidinediones or DPP-4i (incident users)                        | “MPR ≥80%, calculated by using prescription data from the date of the first prescription for that patient to the next prescription after 365 days from the first prescription date”                         | Yes (a,c,e)     |
| Farr, 2014     | Cohort study    | Administrative data | 55.9 ± 11.5 | 54.3 | America | Adult patients with T2D without claims for OADs in the 12 months prior the index date (incident users)                                           | “PDC ≥80%, calculated by taking the number of days a patient had the index drug class on hand during the 1-2-year follow-up based on the days' supply field on pharmacy claims divided by follow-up period” | Yes (a,c,e)     |
| Farr, 2016     | Cohort study    | Administrative data | 55.2 ± 9.8  | 53.0 | America | Adult patients with T2D without claims for DPP-4i in the 12 months prior the index date (incident users)                                         | “PDC ≥80%, calculated by taking the number of days a patient had the index drug class on hand divided by follow-up time”                                                                                    | Yes (a,c,e)     |
| Garcia, 2019   | Cohort study    | Administrative data | 55.2 ± 9.8  | 36.4 | America | Adult patients with T2D                                                                                                                          | “PDC ≥80%, calculated as the sum of the days covered (based on fill date and days' supply) divided by days monitored”                                                                                       | Yes (a,b)       |
| Gatwood, 2018a | Cohort study    | Administrative data | 62.7 ± 10.6 | 95.6 | America | Adult patients with T2D who received an OAD as first-line therapy for the first time (incident users)                                            | “PDC ≥80%, calculated as the sum of the days' supply within each person's records divided for 365 days”                                                                                                     | Yes (a,b,c,d,e) |
| Gatwood, 2018b | Cohort study    | Administrative data | 62.2 ± 0.7  | 95.6 | America | Adult patients with T2D who received an OAD as first-line therapy for the first time (incident users)                                            | “PDC ≥80%, calculated as ratio (%) between the sum of days the medication was on hand and the number of days in the observation period”                                                                     | Yes (a,b,c,e)   |
| Gatwood, 2021  | Cohort study    | Administrative data | 55.2 ± 11.4 | 52.9 | America | Adult patients with T2D                                                                                                                          | “PDC ≥ 80%. The denominator was 180 days and the numerator was a count of the days in the observation period on which patients had medication in their possession according to the days' supply field”      | Yes (a)         |
| Gordon, 2018   | Cohort study    | Administrative data | 57.6 ± 1.4  | 61.7 | Europa  | Adult patients with T2D                                                                                                                          | “MPR ≥80%, defined as the total number of days of available medication (calculated as the quantity of drug prescribed divided by the daily dose), divided by the length of the analysis period”             | Yes (a,d)       |
| Graetz, 2020   | Cohort study    | Administrative data | 63.8 ± 13.0 | 53.8 | America | Adult patients with diabetes                                                                                                                     | “PDC ≥80%, which was based on the number of days' supply of oral diabetes prescription drug dispensed in each month of the study”                                                                           | Yes (a)         |
| Guenette, 2013 | Cohort study    | Administrative data | -           | 48.4 | America | Adult patients with T2D who were newly dispensed an OAD during the inclusion period, without prescriptions in the previous year (incident users) | “MPR ≥80%, calculated as the number of days' supply of OADs or insulin during the 365-day period after OADs initiation divided by 365 days”                                                                 | Yes (a,b,e)     |

|                 |                 |                     |                    |      |         |                                                                                                                                    |                                                                                                                                                                                                                                                                                                                          |               |
|-----------------|-----------------|---------------------|--------------------|------|---------|------------------------------------------------------------------------------------------------------------------------------------|--------------------------------------------------------------------------------------------------------------------------------------------------------------------------------------------------------------------------------------------------------------------------------------------------------------------------|---------------|
| Guenette, 2015  | Cross-sectional | Questionnaire       | (39-78)            | 57.8 | America | Adult patients with T2D                                                                                                            | Score =4 in the MMAS-4 questionnaire                                                                                                                                                                                                                                                                                     | Yes (a)       |
| Guenette, 2016  | Cross-sectional | Questionnaire       | 62.7 ± 9.1         | 58.6 | America | Adult patients with T2D                                                                                                            | Score =8 in the MMAS-8 questionnaire                                                                                                                                                                                                                                                                                     | Yes (a,c)     |
| Hagen, 2014     | Cohort study    | Administrative data | 53.0 ± 7.5         | 85.2 | America | Adult patients with diabetes                                                                                                       | “PDC ≥80%, calculated as the number of days with drugs on hand divided by 365”                                                                                                                                                                                                                                           | Yes (a,b)     |
| Haines, 2018    | Cross-sectional | Questionnaire       | 62.0 ± 8.8         | 53.6 | America | Adult patients with T2D                                                                                                            | Score ≥7 in the MMAS-8 questionnaire                                                                                                                                                                                                                                                                                     | Yes (a)       |
| Hansen, 2015    | Cohort study    | Administrative data | 65.0 ± 1.7         | 95.8 | America | Adult patients with diabetes                                                                                                       | “Refill adherence ≥ 80%, calculated with a claim-based continuous multiple-interval gap (CMG) that estimates the % of days a patient did not possess medication”                                                                                                                                                         | Yes (a,b)     |
| Hayashi, 2018   | Cross-sectional | Questionnaire       | 65.0 ± 11.0        | 64.7 | Asia    | Adult patients with T2D                                                                                                            | -                                                                                                                                                                                                                                                                                                                        | Yes (a)       |
| Hedna, 2013     | Cross-sectional | Administrative data | 68.3 ± 11.4        | 49.1 | Europe  | Adult patients with diabetes                                                                                                       | “Refill adherence ≥80%, measured using the continuous measure of medication acquisition (CMA). CMA is the cumulative number of days’ supply divided by the number of days during the study period”                                                                                                                       | Yes (a)       |
| Heissam, 2015   | Cross-sectional | Questionnaire       | 51.6 ± 10.8        | 55.6 | Africa  | Adult patients with T2D                                                                                                            | Result ≥75% in the MTA scale                                                                                                                                                                                                                                                                                             | Yes (a,d)     |
| Hong, 2014      | Cohort study    | Administrative data | 55 (range unknown) | 58.3 | Asia    | Newly diagnosed adult patients with T2D who received a new hypoglycaemic prescription during the inclusion period (incident users) | “MPR ≥80%, calculated as ratio between the total number of days covered in the supply of prescribed medication and the total number of days of study participation per participant”                                                                                                                                      | Yes (a,e)     |
| Horii, 2019     | Cohort study    | Administrative data | 47.0 ± 8.1         | 90.2 | Asia    | Adult patients with T2D followed for 3 years after medication initiation (incident users)                                          | “PDC ≥80%, calculated as number of days for which the antidiabetic agent was possessed during the observation period/observation period”                                                                                                                                                                                 | Yes (a,b,c,e) |
| Horsburgh, 2019 | Cohort study    | Administrative data | 55 (range unknown) | 52.8 | Oceania | Adult patients with T2D who used metformin for the first time during the inclusion period (incident users)                         | “MPR ≥80%, defined as the proportion of days during a defined time period that a person was in possession of a medication, as determined by pharmacy dispensing records”                                                                                                                                                 | Yes (a,c,d,e) |
| Horvat, 2018    | Cross-sectional | Pill counting       | -                  | 42.1 | Europe  | Adult patients with T2D                                                                                                            | “90-105% of the prescribed medication taken. Adherence (%) was calculated using a pill count method, by dividing the difference in the number of pills recorded in the first home visit and the number of pills remaining in the package at the second home visit with the number of pills prescribed for the intervals” | Yes (a,b,d)   |
| Huber, 2016     | Cohort study    | Administrative data | 69.0 ± 11.9        | 53.7 | Europe  | Adult patients with diabetes                                                                                                       | “PDC ≥80%, calculated as the number of days of medications supplied between the 1rst prescription (x, index date) and the last date (y) of a 1-year interval following the index date, divided by the total days of the interval”                                                                                        | Yes (a,c,d)   |
| Ibrahim, 2021   | Cross-sectional | Questionnaire       | 54.9 ± 15.3        | 45.4 | Asia    | Adult patients with T2D                                                                                                            | Score >11 in a sub-version of the LMAS-14 questionnaire                                                                                                                                                                                                                                                                  | Yes (a,f)     |
| Iyengar, 2014   | Cohort study    | Administrative data | 74.0 ± 6.5         | 42.8 | America | Adult patients with diabetes                                                                                                       | “PDC ≥80%, calculated as the total days’ supply divided by 365 and multiplied by 100”                                                                                                                                                                                                                                    | Yes (a)       |
| Iyengar, 2016   | Cohort study    | Administrative data | 73.8 ± 0.1         | 43.3 | America | Adult patients with diabetes                                                                                                       | “PDC ≥80%, calculated by taking the total days’ supply divided by 365 days and multiplying the result by 100”                                                                                                                                                                                                            | Yes (a)       |
| Jamous, 2011    | Cross-sectional | Questionnaire       | 56.3 ± 9.8         | 63.8 | Asia    | Adult patients with T2D                                                                                                            | Score =8 in the MMAS-8 questionnaire                                                                                                                                                                                                                                                                                     | Yes (a,b,d)   |

|                   |                 |                        |                    |      |         |                                                                                                                                                              |                                                                                                                                                                         |                 |
|-------------------|-----------------|------------------------|--------------------|------|---------|--------------------------------------------------------------------------------------------------------------------------------------------------------------|-------------------------------------------------------------------------------------------------------------------------------------------------------------------------|-----------------|
| Jannuzzi, 2014    | Cross-sectional | Verbal interview       | 59.8 ± 13.9        | 35.3 | America | Adult patients with T2D                                                                                                                                      | “Appropriate use (≥80%) of the prescribed doses”                                                                                                                        | Yes (a)         |
| Jannuzzi, 2020    | Cohort study    | Verbal interview       | 60.2 ± 10.9        | 34.3 | America | Adult patients with T2D                                                                                                                                      | “Appropriate use (≥80%) of the prescribed doses”                                                                                                                        | Yes (a)         |
| Jarab, 2014       | Cross-sectional | Questionnaire          | 64.0 ± 9.8         | 56.7 | Asia    | Adult patients with T2D                                                                                                                                      | Score =4 in the MMAS-4 questionnaire                                                                                                                                    | Yes (a,d)       |
| Jiang, 2020       | Cohort study    | Administrative data    | 77 (range unknown) | 45.9 | Asia    | Adult patients with T2D                                                                                                                                      | “PDC ≥80%, calculated as ratio between the number of days covered by OAD prescription during the observation period and the observation period”                         | Yes (a,b)       |
| Khan, 2014        | Cross-sectional | Questionnaire          | 51.4 ± 12.2        | 44.0 | Asia    | Adult patients with T2D                                                                                                                                      | Score =4 in the MMAS-4 questionnaire                                                                                                                                    | Yes (a,b)       |
| Kharjul, 2019     | Cohort study    | Administrative data    | (21-100)           | 52.0 | Oceania | Adult patients with T2D                                                                                                                                      | “PDC ≥80%, calculated as total days’ supply divided by 356 days”                                                                                                        | Yes (a,b)       |
| Kim, 2016         | Cross-sectional | Questionnaire          | 57.4 ± 12.3        | 38.8 | Asia    | Adult patients with T2D                                                                                                                                      | Score =12 in the Korean version of the ARMS scale                                                                                                                       | Yes (a,f)       |
| Kim, 2018         | Cohort study    | Administrative data    | 50 (range unknown) | 61.2 | Asia    | Newly diagnosed T2D patients (incident users)                                                                                                                | “PDC ≥80%, calculated from the patients’ prescription record”                                                                                                           | Yes (a,b,c,e)   |
| Koyanagi, 2016    | Cross-sectional | Leftover drug counting | 70.1 ± 11.3        | 60.7 | Asia    | Adult patients with diabetes                                                                                                                                 | “Prescription reduction ratio (PRR) <0.2, calculated by evaluating the number of drugs originally prescribed and the reduced amount after use of leftover drugs”        | Yes (a,c,d)     |
| Kumar, 2019       | Cross-sectional | Questionnaire          | 46.6 ± 9.3         | 54.8 | Asia    | Adult patients with T2D                                                                                                                                      | Score between 0 and 2 in an eight-item questionnaire                                                                                                                    | Yes (a,c,d)     |
| Kurtyka, 2016     | Cohort study    | Administrative data    | 51.1 ± 8.4         | 74.4 | Asia    | Adult patients with T2D who initiated a DPP-4i during the index period, without use of DPP-4i in the prior 12 months (incident users)                        | “PDC ≥80%, calculated based on the total number of days during follow-up with medication on hand within the first 12 months of follow-up divided by the follow-up time” | Yes (a,b,c,d,e) |
| Lee, 2013         | Cross-sectional | Questionnaire          | 59.3 ± 11.2        | 61.5 | Asia    | Adult patients with T2D                                                                                                                                      | Score =8 in the MMAS-8 questionnaire                                                                                                                                    | Yes (a,b)       |
| Lee, 2017         | Cross-sectional | Questionnaire          | 62.0 ± 10.4        | 46.6 | Asia    | Adult patients with T2D                                                                                                                                      | Score = 25 in the MARS scale                                                                                                                                            | Yes (a,b,f)     |
| Leporini, 2016    | Cross-sectional | Questionnaire          | (54-75)            | 67.1 | Europe  | Adult patients with T2D receiving first drug therapy or new diabetic treatment during the inclusion period (incident users)                                  | Score =8 in the MMAS-8 questionnaire                                                                                                                                    | Yes (a,d,e)     |
| Lo-Ciganic, 2015  | Cohort study    | Administrative data    | 48.2 ± 10.0        | 33.5 | America | Adult patients with T2D with first prescription fill for OADs during the inclusion period, without OADs prescriptions in the 6 months prior (incident users) | “PDC ≥80%, defined as the number of days covered with oral antidiabetics divided by the number of days plus the accumulated days supplied from the last prescription”   | Yes (a,e)       |
| Lo-Ciganic, 2016  | Cohort study    | Administrative data    | 45.5 ± 11.2        | 32.2 | America | Adult patients with T2D with first prescription fill for OADs during the inclusion period, without OADs prescriptions in the 6 months prior (incident users) | “PDC ≥80%, calculated monthly with ≥1 oral antidiabetic medication, given that 95 % of OAD claims were 30-day prescriptions”                                            | Yes (a,b,d,e,f) |
| Lokhandwala, 2016 | Cohort study    | Administrative data    | 54.9 ± 11.2        | 62.4 | America | Adult patients with T2D naïve to OADs during the pre-index period (incident users)                                                                           | “MPR ≥80%, calculated as the sum of the days’ supply for all index regimen medication fills during the follow-up period divided by follow-up”                           | Yes (a,d,e)     |

|                      |                 |                                                         |                      |      |         |                                                                                                                                   |                                                                                                                                                                                                                                                                            |                 |
|----------------------|-----------------|---------------------------------------------------------|----------------------|------|---------|-----------------------------------------------------------------------------------------------------------------------------------|----------------------------------------------------------------------------------------------------------------------------------------------------------------------------------------------------------------------------------------------------------------------------|-----------------|
| Lopez-Simarro, 2016  | Cohort study    | Mixed method (verbal interview and administrative data) | 67.5 ± 10.7          | 53.4 | Europe  | Adult patients with T2D                                                                                                           | “Mixed-method between self-reported adherence (Haynes-Sackett test) and medication refill ≥80%, determined from the ratio (%) between the total doses refilled from the pharmacy office in the previous year and the total doses prescribed according to the case history” | Yes (a)         |
| Mallah, 2019         | Cross-sectional | Questionnaire                                           | 58.0 ± 11.7          | 43.0 | Asia    | Adult patients with T2D                                                                                                           | Score =7 in the DMAS-7 tool                                                                                                                                                                                                                                                | Yes (a,f)       |
| Manteuffel, 2014     | Cohort study    | Administrative data                                     | 41 (range unknown)   | 58.9 | America | Adult patients with diabetes                                                                                                      | “MPR ≥80%, defined as the number of days of medication supply divided by the number of days between the first and last medication refill dates”                                                                                                                            | Yes (a,b)       |
| Martinez-Perez, 2021 | Cross-sectional | Questionnaire                                           | 65.4 ± 9.7           | 58.5 | Europe  | Adult patients with T2D                                                                                                           | Score =8 in the MMAS-8 questionnaire                                                                                                                                                                                                                                       | Yes (a)         |
| Mhatre, 2016         | Cohort study    | Administrative data                                     | 74.8 (range unknown) | 43.7 | America | Adult patients with diabetes                                                                                                      | PDC ≥ 80%                                                                                                                                                                                                                                                                  | Yes (a)         |
| Miller, 2015         | Cohort study    | Administrative data                                     | 50.7 ± 3.2           | 49.2 | America | Adult patients with diabetes                                                                                                      | “MPR ≥ 80%, calculated as days supplied divided by the 365 days in a year, less any days spent in the hospital”                                                                                                                                                            | Yes (a)         |
| Min, 2019            | Cohort study    | Administrative data                                     | (57-72)              | 96.0 | America | Adult patients with T2D newly using metformin, without OAD refill in the prior 180 days (incident users)                          | “PDC ≥80%, calculated after 1 year following intensification with a sulfonylurea”                                                                                                                                                                                          | Yes (a,b,c,d,e) |
| Mirahmadizadeh, 2020 | Cross-sectional | Questionnaire                                           | 56.9 ± 0.52          | 41.2 | Asia    | Adult patients with T2D                                                                                                           | Score =8 in the MMAS-8 questionnaire                                                                                                                                                                                                                                       | (a,d)           |
| Mroueh, 2018         | Cross-sectional | Questionnaire                                           | 59.3 ± 10.8          | 45.7 | Asia    | Adult patients with T2D                                                                                                           | Score >38 in the LMAS-14 questionnaire                                                                                                                                                                                                                                     | Yes (a,f)       |
| Mukherjee, 2013      | Cross-sectional | Verbal interview                                        | 42.6 ± 15.7          | 66.4 | Asia    | Adult patients with T2D                                                                                                           | “Taking more than 80% of the prescribed anti-diabetes medicines and having HbA1C of <7%”                                                                                                                                                                                   | Yes (a,d)       |
| Naffaa, 2020         | Cohort study    | Administrative data                                     | 57.5 ± 13.1          | 52.0 | Asia    | Adult patients with T2D who initiated therapy with metformin during the inclusion period (incident users)                         | “PDC ≥80%, calculated by dividing the supply days of dispensed metformin by the total follow-up time (including the day when metformin was last dispensed)”                                                                                                                | Yes (a,b,c)     |
| Nichols, 2016        | Cohort study    | Administrative data                                     | 58.6 (range unknown) | 9.1  | America | Adult patients with T2D who initiated therapy with metformin as their first ever OAD during the inclusion period (incident users) | “BRBPDC ≥80%. This method estimates adherence over the 90 days preceding a given HbA1c measurement”                                                                                                                                                                        | Yes (a,c,e)     |
| Nichols, 2018        | Cohort study    | Administrative data                                     | -                    | 52.0 | America | Adult patients with T2D                                                                                                           | “PDC ≥80%, defined as the % of days in the measurement period covered by prescription fills of the same medication or same therapeutic class”                                                                                                                              | Yes (a,f)       |
| Nigam, 2012          | Cohort study    | Administrative data                                     | 54.2 ± 0.1           | 57.6 | America | Adult patients with T2D                                                                                                           | “MPR ≥75%, calculated as the sum of days' supply for each prescription claim in the post-index period expressed as a % of 365 days”                                                                                                                                        | Yes (a,c)       |
| Nishimura, 2019a     | Cohort study    | Administrative data                                     | 59.9 ± 8.0           | 64.8 | Asia    | Adult patients without a prescription for any antidiabetic drug of interest during the 12-month pre-index period (incident users) | “PDC ≥80%, calculated from the index date to the first discontinuation of index treatment. Adherence was calculated according to the number of antidiabetic drug prescription days”                                                                                        | Yes (a,c,e)     |
| Nishimura, 2019b     | Cohort study    | Administrative data                                     | 59.9 ± 9.3           | 72.3 | Asia    | Adult patients with T2D                                                                                                           | “PDC ≥80%, calculated as the number of days the treatment was available to the patient divided by the number of days in the treatment period”                                                                                                                              | Yes (a,d)       |

|                     |                 |                     |                    |      |             |                                                                                                                                                                                               |                                                                                                                                                                             |                 |
|---------------------|-----------------|---------------------|--------------------|------|-------------|-----------------------------------------------------------------------------------------------------------------------------------------------------------------------------------------------|-----------------------------------------------------------------------------------------------------------------------------------------------------------------------------|-----------------|
| Ofori-Asenso, 2019a | Cohort study    | Administrative data | 62.7 ± 13.3        | 57.2 | Oceania     | Adult patients with T2D who were newly dispensed DPP-4i, without prescriptions for DPP-4i in the prior 12 months (incident users)                                                             | “PDC ≥80%, calculated by dividing the number of days the patient was covered by medication during the follow-up period by 365 days”                                         | Yes (a,c,e)     |
| Ofori-Asenso, 2019b | Cohort study    | Administrative data | 60.9 ± 11.5        | 59.5 | Oceania     | Adult patients with T2D who were newly dispensed SGLT-2i, without prescriptions for SGLT-2i in the prior 12 months (incident users)                                                           | “PDC ≥80%, calculated by dividing the number of days the patient was covered by medication during the follow-up period by 365 days”                                         | Yes (a,c,e)     |
| Oh, 2020            | Cohort study    | Administrative data | 68.4 ± 12.0        | 60.9 | Asia        | Treatment naïve adult patients with T2D (incident users)                                                                                                                                      | “PDC ≥80%, calculated as the total number of days the DPP-4i was taken divided by the total number of days in the treatment period in which treatment was expected to take” | Yes (a,c,e)     |
| Olickal, 2021       | Cross-sectional | Questionnaire       | 53 (range unknown) | 45.8 | Asia        | Adult patients with T2D                                                                                                                                                                       | Score =0 in the MGL scale                                                                                                                                                   | Yes (a)         |
| O’Shea, 2013        | Cohort study    | Administrative data | -                  | 44.0 | Europe      | Adult patients with T2D who were dispensed either a sulfonylurea or metformin during the inclusion period, without prescription claims for any OADs in the previous 6 months (incident users) | “MPR ≥80%, calculated as the number of days of medication obtained by a patients during a specific period, divided by the number of days in the specified period”           | Yes (a,b,c,d,e) |
| O’Shea, 2015        | Cohort study    | Administrative data | -                  | 51.4 | Europe      | Adult patients with T2D who were dispensed either a sulfonylurea or metformin during the inclusion period, without prescription claims for any OADs in the previous 6 months (incident users) | “MPR ≥80%, calculated as the number of days of medication obtained by a patient during a specific period, divided by the number of days in the specified period”            | Yes (a,d,e)     |
| Oung, 2017          | Cohort study    | Administrative data | 52.0 ± 10.0        | 40.8 | America     | Adult patients with diabetes                                                                                                                                                                  | “PDC ≥80%, defined as the number of days the medication is supplied during the study period divided by the number of days in the study period”                              | Yes (a,c)       |
| Pascal, 2012        | Cross-sectional | Questionnaire       | 36.8 ± 5.4         | 37.5 | Africa      | Adult patients with T2D                                                                                                                                                                       | Score =4 in a questionnaire using an ordinal scoring system of 0-4 points                                                                                                   | Yes (a,f)       |
| Peeters, 2015       | Cross-sectional | Questionnaire       | (30-69)            | 42.9 | Asia/Europe | Adult patients with T2D                                                                                                                                                                       | “Taking >80% of OADs, calculated using the MGL questionnaire”                                                                                                               | Yes (a)         |
| Quilliam, 2013      | Cohort study    | Administrative data | 52.8 ± 1.4         | 51.1 | America     | Adult patients with T2D initiating treatment with metformin, a sulfonylurea, or a thiazolidinedione (incident users)                                                                          | “MPR ≥80%, calculated by dividing the summed days' supply of the identified medications divided by the number of days between the first and last identified claims”         | Yes (a,b,c,d,e) |
| Rahmatullah, 2021   | Cross-sectional | Questionnaire       | 52.7 ± 11.2        | 52.7 | Asia        | Adult patients with T2D                                                                                                                                                                       | -                                                                                                                                                                           | Yes (a)         |
| Rana, 2017          | Cross-sectional | Questionnaire       | 50.2 ± 8.5         | 37.0 | Asia        | Adult patients with T2D                                                                                                                                                                       | Score =8 in the MMAS-8 questionnaire                                                                                                                                        | Yes (a,b)       |
| Ranashinge, 2018    | Cross-sectional | Questionnaire       | 60.6 ± 11.1        | 46.1 | Asia        | Adult patients with diabetes                                                                                                                                                                  | No positive response in all three screens of the BMQ questionnaire                                                                                                          | Yes (a,c)       |
| Rascati, 2017       | Cohort study    | Administrative data | 63.2 ± 8.4         | 49.2 | America     | Adult diabetic patients                                                                                                                                                                       | “PDC ≥80%, calculated as the proportion of days during the 365-day post-index period that the patient has any DPP-4i on hand”                                               | Yes (a,c)       |

|                     |                 |                     |             |      |         |                                                                                                                                        |                                                                                                                                                                                                                                                                    |               |
|---------------------|-----------------|---------------------|-------------|------|---------|----------------------------------------------------------------------------------------------------------------------------------------|--------------------------------------------------------------------------------------------------------------------------------------------------------------------------------------------------------------------------------------------------------------------|---------------|
| Rathish, 2019       | Cross-sectional | Questionnaire       | (49-67)     | 50.0 | Asia    | Adult patients with T2D                                                                                                                | Score =4 in the MMAS-4 questionnaire                                                                                                                                                                                                                               | Yes (a)       |
| Reach, 2011         | Cross-sectional | Questionnaire       | 59.0 ± 4.0  | 60.0 | Europe  | Adult patients with T2D                                                                                                                | Score >3 in a 5-item questionnaire on adherence                                                                                                                                                                                                                    | Yes (a)       |
| Reach, 2018         | Cross-sectional | Questionnaire       | 67.9 ± 9.7  | 55.8 | Europe  | Adult patients with T2D                                                                                                                | Score <1 in the six-item questionnaire by Girerd et al.                                                                                                                                                                                                            | Yes (a)       |
| Rinne, 2015         | Cohort study    | Administrative data | 67.2 ± 3.5  | 97.9 | America | Adult patients with diabetes                                                                                                           | MPR ≥80%                                                                                                                                                                                                                                                           | Yes (a)       |
| Romagnoli, 2021     | Cohort study    | Administrative data | (11-103)    | 52.0 | Europe  | Adult patients with T2D                                                                                                                | “Ratio between Received Daily Dose (RDD) and Prescribed Daily Dose (PDD) ≥ 80%”                                                                                                                                                                                    | Yes (a,c,d)   |
| Sacks, 2013         | Cohort study    | Administrative data | 74.5 ± 6.4  | 35.0 | America | Adult patients with diabetes                                                                                                           | “MPR ≥80%, calculated as the days on which patients had medication available in each OAD class as the sum of days supplied for each fill over the calendar year, plus any days remaining from previous year fills”                                                 | Yes (a,c)     |
| Sacks, 2015         | Cohort study    | Administrative data | 73.8 ± 0.1  | 37.6 | America | Adult patients with diabetes                                                                                                           | “PDC ≥80%, calculated the PDC as the ratio of days supplied to calendar days in the observation period”                                                                                                                                                            | Yes (a)       |
| Sankar, 2015        | Cross-sectional | Questionnaire       | 54.2 ± 11.5 | 42.2 | Asia    | Adult patients with diabetes                                                                                                           | Score ≥6 in the MMAS-8 questionnaire                                                                                                                                                                                                                               | Yes (a)       |
| Saraiva, 2020       | Cross-sectional | Questionnaire       | (52-68)     | 35.7 | America | Adult patients with T2D                                                                                                                | Score =4 in the MMAS-4 questionnaire                                                                                                                                                                                                                               | Yes (a,c,d)   |
| Satirapoj, 2020     | Cross-sectional | Questionnaire       | 65.5 ± 10.0 | 49.3 | Asia    | Adult patients with T2D                                                                                                                | “Taking the medication exactly as prescribed, self-reported on the 5-level Likert Scale”                                                                                                                                                                           | Yes (a)       |
| Sattler, 2014       | Cohort study    | Administrative data | 74.2 ± 7.8  | 22.6 | America | Adult patients with T2D                                                                                                                | “PDC ≥80%, defined as the number of days of medication supply in the observation period multiplied per 100”                                                                                                                                                        | Yes (a,b)     |
| Saundankar, 2016    | Cohort study    | Administrative data | 71.6 ± 0.7  | 45.6 | America | Adult patients with T2D                                                                                                                | “PDC ≥80%, defined as the percent of days in the measurement period covered by prescription claims for the same medication”                                                                                                                                        | Yes (a,b,c,f) |
| Schwab, 2019        | Cohort study    | Administrative data | (19-89)     | 51.6 | America | Adult patients with T2D new to OADs entirely or initiating an OAD that the individual had not previously used (incident users)         | “PDC ≥80%, defined as the number of days with an OAD on-hand divided by the number of days from the index date to the end of the measurement period”                                                                                                               | Yes (a,e)     |
| Shields, 2020       | Cohort study    | Administrative data | -           | /    | Europe  | Adult patients with T2D                                                                                                                | “MPR ≥80%, defined as the number of days of available medication (calculated by dividing the quantity prescribed by the daily dose) divided by the number of days between the first prescription and the adherence period end date (365 days), multiplied per 100” | Yes (a,d)     |
| Shrestha, 2013      | Cross-sectional | Questionnaire       | 58.1 ± 11.6 | 48.0 | Asia    | Adult patients with T2D                                                                                                                | -                                                                                                                                                                                                                                                                  | Yes (a,f)     |
| Sicras-Mainar, 2014 | Cohort study    | Administrative data | 74.2 ± 6.2  | 49.1 | Europe  | Adult patients with T2D                                                                                                                | “Compliance ≥80%, calculated by dividing the total number of tablets dispensed by those recommended or prescribed”                                                                                                                                                 | Yes (a,d)     |
| Simard, 2015        | Cohort study    | Administrative data | 67.0 ± 10.0 | 49.0 | America | Adult patients with diabetes without an OAD or insulin prescription within the 2 years prior to the cohort entry date (incident users) | “MPR ≥80%, calculated as the number of days of medication supply over a given follow-up period, expressed as percentage”                                                                                                                                           | Yes (a,e)     |
| Simard, 2018        | Cohort study    | Administrative data | 72.3 ± 8.7  | 55.4 | America | Adult patients with diabetes without metformin, an OAD or insulin prescription within the 2 years prior to the                         | “MPR ≥80%, defined as the proportion of days medication supplied over a given follow-up period, expressed as percentage”                                                                                                                                           | Yes (a,c)     |

| cohort entry date (incident users) |                 |                     |                    |      |         |                                                                                                                                      |                                                                                                                                                                                                                                                      |             |
|------------------------------------|-----------------|---------------------|--------------------|------|---------|--------------------------------------------------------------------------------------------------------------------------------------|------------------------------------------------------------------------------------------------------------------------------------------------------------------------------------------------------------------------------------------------------|-------------|
| Simon-Tuval, 2018                  | Cross-sectional | Administrative data | 55.3 ± 9.6         | 42.9 | Asia    | Adult patients with T2D                                                                                                              | “PDC ≥80%, calculated by dividing the number of days the medication was available by the total time interval from index date through the month of the last prescription refill within the follow-up period”                                          | Yes (a)     |
| Singhal, 2019                      | Cohort study    | Administrative data | 53.4 ± 9.1         | 50.7 | America | Adult patients with T2D                                                                                                              | “PDC ≥80%, calculated as the total number of days the index medication was available divided by the total number of days in the follow-up period”                                                                                                    | Yes (a,c)   |
| Taira, 2017                        | Cohort study    | Administrative data | 67.8 ± 2.6         | 52.7 | America | Adult patients with T2D                                                                                                              | “MPR ≥80%, calculated as the ratio of the number of days for which a patient has medication on hand divided by the total number of days a patient was enrolled in a drug plan”                                                                       | Yes (a)     |
| Tanabe, 2017                       | Cohort study    | Administrative data | 65.5 ± 3.4         | 62.6 | Asia    | Adult patients with T2D                                                                                                              | “Total sum of prescription days/total number of observation days ≥ 80%”                                                                                                                                                                              | Yes (a,c)   |
| Tandon, 2015                       | Cross-sectional | Questionnaire       | 57.5 ± 10.0        | 27.0 | Africa  | Adult patients with T2D                                                                                                              | Score =8 in the MMAS-8 questionnaire                                                                                                                                                                                                                 | Yes (a,d)   |
| Tang, 2020                         | Cohort study    | Administrative data | 66.4 ± 12.3        | 58.6 | Europe  | Adult patients with T2D without metformin use in the 12 months prior the first prescription in the index year (incident users)       | “PDC ≥80%, calculated as the sum of days’ supply of metformin divided by the number of in the follow-up period”                                                                                                                                      | Yes (a,c,e) |
| Tiv, 2012                          | Cross-sectional | Questionnaire       | 65.0 ± 11.1        | 54.4 | Europe  | Adult patients with T2D                                                                                                              | Answering “no” to all questions of a six-item questionnaire                                                                                                                                                                                          | Yes (a)     |
| Tunceli, 2015a                     | Cohort study    | Administrative data | 60.7 ± 12.6        | 50.6 | America | Adult patients with T2D                                                                                                              | “PDC ≥80%, calculated as the number of days with the drug on-hand divided follow-up period”                                                                                                                                                          | Yes (a,d)   |
| Tunceli, 2015b                     | Cohort study    | Administrative data | -                  | 57.0 | Europe  | Adult patients with T2D                                                                                                              | “PDC ≥80%, calculated as the number of days with drug supplied during the observation period divided follow-up period”                                                                                                                               | Yes (a,b,d) |
| Vichayanrat, 2013                  | Cohort study    | Verbal interview    | 52.0 ± 11.7        | 46.7 | Asia    | Adult patients with T2D either newly diagnosed starting OADs or treated with OAD monotherapy for less than 6 months (incident users) | “Compliance ≥ 90%”                                                                                                                                                                                                                                   | Yes (a,c,e) |
| Vietri, 2016                       | Cross-sectional | Questionnaire       | 58.9 ± 12.2        | 55.0 | America | Adult patients with T2D                                                                                                              | “Adherence has been calculated with the adherence estimator, a three-item measure which allows for categorization of patients into low, medium, or high risk for non-adherence”                                                                      | Yes (a)     |
| Vittorino Gaddi, 2014              | Cohort study    | Administrative data | 70 (range unknown) | 50.9 | Europe  | Adult patients with diabetes who were first prescribed OADs during the recruitment period (incident users)                           | “MPR ≥80%, calculated as sum of total days’ supply for all fills divided by number of days between the first and last fills plus days’ supply of the last fill”                                                                                      | Yes (a,d,e) |
| Vlacho, 2021                       | Cohort study    | Administrative data | 60.8 ± 11.7        | -    | Europe  | Adult patients with T2D initiating a combination therapy                                                                             | "MPR≥ 80%, calculated as the number of days covered by dispensation divided by the number of days covered by prescription, which is defined as days between the date of initiation of index medication and discontinuation event or up to 24 months" | Yes (a,d)   |
| Waari, 2018                        | Cross-sectional | Questionnaire       | 56.6 ± 11.9        | 32.4 | Africa  | Adult patients with T2D                                                                                                              | Score =8 in the MMAS-8 questionnaire                                                                                                                                                                                                                 | Yes (a,d)   |
| Walz, 2014                         | Cross-sectional | Questionnaire       | 69.0 ± 9.5         | 60.7 | Europe  | Adult patients with T2D                                                                                                              | “Always taking medications as prescribed”, assessed by a questionnaire developed by Grant et al.                                                                                                                                                     | Yes (a)     |

|                |                 |                     |                 |      |         |                              |                                                                                                                                                     |             |
|----------------|-----------------|---------------------|-----------------|------|---------|------------------------------|-----------------------------------------------------------------------------------------------------------------------------------------------------|-------------|
| White, 2012    | Cross-sectional | Pill counting       | (62-74)         | 66.7 | Europe  | Adult patients with T2D      | “90-100% of prescribed doses taken, measured by MEMS (Medication Event Monitoring System)”                                                          | Yes (a,b,c) |
| Wong, 2011     | Cohort study    | Administrative data | /               | 55.0 | Asia    | Adult patients with diabetes | “MPR $\geq$ 80%, defined as the ratio of total days of medication supplied (not including the last prescription) to total days in a period of time” | Yes (a,b,c) |
| Wong, 2012     | Cohort study    | Administrative data | 67.9 $\pm$ 11.0 | 97.9 | America | Adult patients with diabetes | “Having medications available for at least 80% of the period”, measured with the validated ReComp algorithm                                         | Yes (a)     |
| Wong, 2014     | Cohort study    | Administrative data | 67.8 $\pm$ 11.3 | 97.9 | America | Adult patients with diabetes | “MPR $\geq$ 80%, which measure that estimates the proportion of days within an interval for which a patient has medication available”               | Yes (a,b,f) |
| Wong, 2015     | Cross-sectional | Questionnaire       | 63.2 $\pm$ 9.7  | 46.5 | Asia    | Adult patients with T2D      | Score $>$ 6 in the MMAS-8 questionnaire                                                                                                             | Yes (a,b,f) |
| Wu, 2016       | Cross-sectional | Questionnaire       | (34-83)         | 50.8 | Asia    | Adult patients with T2D      | Score 6-8 in the MMAS-8 questionnaire                                                                                                               | Yes (a)     |
| Zhou, 2013     | Cross-sectional | Verbal interview    | 53.1 $\pm$ 14.6 | 52.0 | Asia    | Adult patients with diabetes | “Taking $\geq$ 90% of the daily prescribed medication”                                                                                              | Yes (a)     |
| Zhu, 2015      | Cohort study    | Administrative data | 63.7 $\pm$ 4.7  | 50.9 | Asia    | Adult patients with T2D      | “PDC $\geq$ 80%, defined as the total number of medication-covered days divided by 365 days”                                                        | Yes (a,b,d) |
| Zomahoun, 2016 | Cohort study    | Administrative data | 62.6 $\pm$ 9.2  | 57.7 | America | Adult patients with T2D      | “PDC $\geq$ 80%, measured as the proportion of days covered using a pharmacy claims database”                                                       | Yes (a,b)   |
| Zongo, 2016    | Cross-sectional | Questionnaire       | (59-68)         | 62.1 | America | Adult patients with T2D      | Score =8 in the MMAS-8 questionnaire                                                                                                                | Yes (a,f)   |

List of abbreviations: ARMS: Adherence to Refills and Medication Scale; BMQ: Brief Medication Questionnaire; BRBPDC: Biologic Response Based Proportion of Days Covered; DMAS: Diabetes Medication Adherence Scale; DPP4-i = dipeptidyl peptidase-4 inhibitors; GMAS: General Medication Adherence Scale; LMAS-14: 14-item Lebanese Medication Adherence Scale; MARS: Medication Adherence Report Scale; MAQ: Medication Adherence Questionnaire; MCQ: Medication Compliance Questionnaire Adherence; MGL: Morisky, Green, and Levine; MMAPS: Morisky Adherence Predictor Scale; MMAS-4: four-item Morisky Medication Adherence Scale; MMAS-8: eight-item Morisky Medication Adherence Scale; MPR: Medication Possession Ratio; MTA: Measure Treatment Adherence Scale; PDC: Proportion of Days Covered; SGLT-2i = sodium-glucose co-transporter-2 inhibitors

\*Stratification for: <sup>a</sup> age; <sup>b</sup> gender; <sup>c</sup> therapeutic class; <sup>d</sup> treatment regimen (monotherapy, dual therapy, oral therapy + insulin); <sup>e</sup> follow-up period for incident patients; <sup>f</sup> association between adherence and blood glucose control.

**Table S2. Risk of bias of cross-sectional studies**

| Study name           | Was the study's target population a close representation of the national population in relation to relevant variables? | Was the sampling frame a true or close representation of the target population? | Was some form of random selection used to select the sample, or was a census undertaken? | Was the likelihood of nonresponse bias minimal? | Were data collected directly from the subjects (as opposed to a proxy)? | Was an acceptable case definition used in the study? | Was the study instrument that measured the parameter of interest shown to have validity and reliability? | Was the same mode of data collection used for all subjects? | Were the numerator(s) and denominator(s) for the parameter of interest appropriate? | Total |
|----------------------|------------------------------------------------------------------------------------------------------------------------|---------------------------------------------------------------------------------|------------------------------------------------------------------------------------------|-------------------------------------------------|-------------------------------------------------------------------------|------------------------------------------------------|----------------------------------------------------------------------------------------------------------|-------------------------------------------------------------|-------------------------------------------------------------------------------------|-------|
| Abdullah, 2019       | 1                                                                                                                      | 1                                                                               | 1                                                                                        | 1                                               | 1                                                                       | 1                                                    | 1                                                                                                        | 1                                                           | 0                                                                                   | 8/9   |
| Acharya, 2019        | 1                                                                                                                      | 0                                                                               | 0                                                                                        | 1                                               | 1                                                                       | 1                                                    | 1                                                                                                        | 1                                                           | 1                                                                                   | 7/9   |
| Adisa, 2013          | 0                                                                                                                      | 1                                                                               | 1                                                                                        | 1                                               | 1                                                                       | 1                                                    | 1                                                                                                        | 1                                                           | 0                                                                                   | 7/9   |
| Aditama, 2019        | 1                                                                                                                      | 0                                                                               | 0                                                                                        | 1                                               | 1                                                                       | 1                                                    | 0                                                                                                        | 1                                                           | 0                                                                                   | 5/9   |
| Afaya, 2020          | 0                                                                                                                      | 0                                                                               | 0                                                                                        | 1                                               | 1                                                                       | 1                                                    | 1                                                                                                        | 1                                                           | 1                                                                                   | 6/9   |
| Ahmad, 2013          | 0                                                                                                                      | 0                                                                               | 1                                                                                        | 1                                               | 1                                                                       | 1                                                    | 1                                                                                                        | 1                                                           | 1                                                                                   | 7/9   |
| Aloudah, 2018        | 1                                                                                                                      | 1                                                                               | 0                                                                                        | 1                                               | 1                                                                       | 1                                                    | 1                                                                                                        | 1                                                           | 1                                                                                   | 8/9   |
| AlQarni, 2019        | 1                                                                                                                      | 0                                                                               | 1                                                                                        | 1                                               | 1                                                                       | 1                                                    | 1                                                                                                        | 1                                                           | 1                                                                                   | 8/9   |
| Aminde, 2019         | 1                                                                                                                      | 0                                                                               | 0                                                                                        | 1                                               | 1                                                                       | 1                                                    | 1                                                                                                        | 1                                                           | 0                                                                                   | 6/9   |
| Andanalusia, 2019    | 1                                                                                                                      | 0                                                                               | 0                                                                                        | 1                                               | 1                                                                       | 1                                                    | 1                                                                                                        | 1                                                           | 0                                                                                   | 6/9   |
| Arulmozhi, 2014      | 1                                                                                                                      | 1                                                                               | 1                                                                                        | 1                                               | 1                                                                       | 1                                                    | 1                                                                                                        | 1                                                           | 0                                                                                   | 8/9   |
| Ashur, 2015          | 1                                                                                                                      | 1                                                                               | 1                                                                                        | 1                                               | 1                                                                       | 0                                                    | 1                                                                                                        | 1                                                           | 1                                                                                   | 8/9   |
| Ayoub, 2019          | 1                                                                                                                      | 1                                                                               | 1                                                                                        | 1                                               | 1                                                                       | 1                                                    | 1                                                                                                        | 1                                                           | 1                                                                                   | 9/9   |
| Benzaravy, 2019      | 1                                                                                                                      | 0                                                                               | 0                                                                                        | 1                                               | 1                                                                       | 0                                                    | 1                                                                                                        | 1                                                           | 1                                                                                   | 6/9   |
| Bonger, 2018         | 1                                                                                                                      | 1                                                                               | 0                                                                                        | 1                                               | 1                                                                       | 0                                                    | 0                                                                                                        | 1                                                           | 1                                                                                   | 6/9   |
| Bruce, 2015          | 0                                                                                                                      | 1                                                                               | 0                                                                                        | 1                                               | 1                                                                       | 1                                                    | 1                                                                                                        | 1                                                           | 1                                                                                   | 7/9   |
| Chew, 2015           | 0                                                                                                                      | 1                                                                               | 1                                                                                        | 1                                               | 1                                                                       | 0                                                    | 1                                                                                                        | 1                                                           | 1                                                                                   | 7/9   |
| de Vries, 2014       | 0                                                                                                                      | 0                                                                               | 1                                                                                        | 1                                               | 1                                                                       | 1                                                    | 1                                                                                                        | 1                                                           | 1                                                                                   | 7/9   |
| Elsous, 2017         | 0                                                                                                                      | 1                                                                               | 1                                                                                        | 1                                               | 1                                                                       | 1                                                    | 1                                                                                                        | 1                                                           | 1                                                                                   | 8/9   |
| Fai, 2017            | 0                                                                                                                      | 0                                                                               | 0                                                                                        | 1                                               | 1                                                                       | 1                                                    | 1                                                                                                        | 1                                                           | 0                                                                                   | 5/9   |
| Guenette, 2015       | 1                                                                                                                      | 1                                                                               | 0                                                                                        | 1                                               | 1                                                                       | 1                                                    | 1                                                                                                        | 1                                                           | 0                                                                                   | 7/9   |
| Guenette, 2016       | 1                                                                                                                      | 1                                                                               | 1                                                                                        | 1                                               | 1                                                                       | 1                                                    | 1                                                                                                        | 1                                                           | 1                                                                                   | 9/9   |
| Haines, 2018         | 0                                                                                                                      | 1                                                                               | 1                                                                                        | 1                                               | 1                                                                       | 1                                                    | 1                                                                                                        | 1                                                           | 0                                                                                   | 7/9   |
| Hayashi, 2018        | 0                                                                                                                      | 0                                                                               | 1                                                                                        | 1                                               | 1                                                                       | 0                                                    | 0                                                                                                        | 1                                                           | 1                                                                                   | 5/9   |
| Heissam, 2015        | 1                                                                                                                      | 0                                                                               | 1                                                                                        | 1                                               | 1                                                                       | 1                                                    | 1                                                                                                        | 1                                                           | 1                                                                                   | 8/9   |
| Ibrahim, 2021        | 1                                                                                                                      | 1                                                                               | 1                                                                                        | 1                                               | 1                                                                       | 1                                                    | 0                                                                                                        | 1                                                           | 1                                                                                   | 8/9   |
| Jamous, 2011         | 0                                                                                                                      | 0                                                                               | 0                                                                                        | 1                                               | 1                                                                       | 1                                                    | 1                                                                                                        | 1                                                           | 0                                                                                   | 5/9   |
| Jannuzzi, 2014       | 1                                                                                                                      | 0                                                                               | 0                                                                                        | 1                                               | 1                                                                       | 1                                                    | 1                                                                                                        | 1                                                           | 0                                                                                   | 6/9   |
| Jannuzzi, 2020       | 1                                                                                                                      | 0                                                                               | 0                                                                                        | 1                                               | 1                                                                       | 1                                                    | 1                                                                                                        | 1                                                           | 1                                                                                   | 7/9   |
| Jarab, 2014          | 0                                                                                                                      | 1                                                                               | 1                                                                                        | 1                                               | 1                                                                       | 1                                                    | 1                                                                                                        | 1                                                           | 0                                                                                   | 7/9   |
| Khan, 2014           | 0                                                                                                                      | 1                                                                               | 1                                                                                        | 1                                               | 1                                                                       | 1                                                    | 1                                                                                                        | 1                                                           | 1                                                                                   | 8/9   |
| Kim, 2016            | 0                                                                                                                      | 1                                                                               | 1                                                                                        | 1                                               | 1                                                                       | 1                                                    | 1                                                                                                        | 1                                                           | 1                                                                                   | 8/9   |
| Kumar, 2019          | 0                                                                                                                      | 0                                                                               | 1                                                                                        | 1                                               | 1                                                                       | 0                                                    | 0                                                                                                        | 1                                                           | 1                                                                                   | 5/9   |
| Lee, 2013            | 0                                                                                                                      | 1                                                                               | 1                                                                                        | 1                                               | 1                                                                       | 1                                                    | 1                                                                                                        | 1                                                           | 1                                                                                   | 8/9   |
| Lee, 2017            | 0                                                                                                                      | 1                                                                               | 1                                                                                        | 1                                               | 1                                                                       | 1                                                    | 1                                                                                                        | 1                                                           | 1                                                                                   | 8/9   |
| Leporini, 2016       | 0                                                                                                                      | 0                                                                               | 1                                                                                        | 1                                               | 1                                                                       | 1                                                    | 1                                                                                                        | 1                                                           | 1                                                                                   | 7/9   |
| Mallah, 2019         | 1                                                                                                                      | 1                                                                               | 1                                                                                        | 1                                               | 1                                                                       | 1                                                    | 1                                                                                                        | 1                                                           | 1                                                                                   | 9/9   |
| Martinez-Perez, 2021 | 0                                                                                                                      | 1                                                                               | 1                                                                                        | 1                                               | 1                                                                       | 1                                                    | 1                                                                                                        | 1                                                           | 1                                                                                   | 8/9   |
| Mirahmadizadeh, 2020 | 0                                                                                                                      | 1                                                                               | 1                                                                                        | 1                                               | 1                                                                       | 1                                                    | 1                                                                                                        | 1                                                           | 1                                                                                   | 8/9   |
| Mroueh, 2018         | 1                                                                                                                      | 0                                                                               | 1                                                                                        | 1                                               | 1                                                                       | 1                                                    | 1                                                                                                        | 1                                                           | 1                                                                                   | 8/9   |
| Mukherjee, 2013      | 0                                                                                                                      | 0                                                                               | 1                                                                                        | 1                                               | 1                                                                       | 1                                                    | 0                                                                                                        | 1                                                           | 1                                                                                   | 6/9   |
| Olickal, 2021        | 0                                                                                                                      | 0                                                                               | 1                                                                                        | 1                                               | 1                                                                       | 1                                                    | 1                                                                                                        | 1                                                           | 1                                                                                   | 7/9   |

|                   |   |   |   |   |   |   |   |   |   |     |
|-------------------|---|---|---|---|---|---|---|---|---|-----|
| Pascal, 2012      | 0 | 0 | 1 | 1 | 1 | 1 | 0 | 1 | 0 | 5/9 |
| Peeters, 2015     | 1 | 0 | 0 | 1 | 1 | 0 | 1 | 1 | 0 | 5/9 |
| Rahmatullah, 2021 | 1 | 0 | 1 | 1 | 1 | 0 | 0 | 1 | 1 | 6/9 |
| Rana, 2017        | 0 | 0 | 0 | 1 | 1 | 1 | 1 | 1 | 0 | 5/9 |
| Ranashinge, 2018  | 1 | 0 | 1 | 1 | 1 | 1 | 1 | 1 | 1 | 8/9 |
| Rathish, 2019     | 1 | 1 | 0 | 1 | 1 | 1 | 1 | 1 | 1 | 8/9 |
| Reach, 2011       | 0 | 0 | 1 | 1 | 1 | 1 | 0 | 1 | 0 | 5/9 |
| Reach, 2018       | 0 | 1 | 1 | 1 | 1 | 1 | 0 | 1 | 1 | 7/9 |
| Sankar, 2015      | 1 | 1 | 1 | 1 | 1 | 0 | 1 | 1 | 1 | 8/9 |
| Saraiva, 2020     | 1 | 0 | 0 | 1 | 1 | 1 | 1 | 1 | 1 | 7/9 |
| Satirapoj, 2020   | 1 | 1 | 1 | 1 | 1 | 0 | 1 | 1 | 1 | 8/9 |
| Shrestha, 2013    | 0 | 1 | 0 | 1 | 1 | 0 | 0 | 1 | 0 | 4/9 |
| Tandon, 2015      | 1 | 0 | 0 | 1 | 1 | 1 | 1 | 1 | 0 | 6/9 |
| Tiv, 2012         | 0 | 1 | 1 | 1 | 1 | 1 | 0 | 1 | 1 | 7/9 |
| Vietri, 2016      | 1 | 1 | 1 | 1 | 1 | 1 | 1 | 1 | 1 | 9/9 |
| Waari, 2018       | 1 | 0 | 1 | 1 | 1 | 1 | 1 | 1 | 0 | 7/9 |
| Walz, 2014        | 0 | 1 | 1 | 1 | 1 | 0 | 0 | 1 | 1 | 6/9 |
| Wong, 2015        | 0 | 1 | 1 | 1 | 1 | 0 | 1 | 1 | 1 | 7/9 |
| Wu, 2016          | 1 | 1 | 1 | 1 | 1 | 0 | 1 | 1 | 0 | 7/9 |
| Zhou, 2013        | 1 | 0 | 1 | 1 | 1 | 0 | 0 | 1 | 0 | 5/9 |
| Zongo, 2016       | 1 | 0 | 1 | 1 | 1 | 1 | 1 | 1 | 1 | 8/9 |

### Table S3. Risk of bias of cohort studies

[illegible]

|                       |   |   |   |   |   |   |   |   |     |
|-----------------------|---|---|---|---|---|---|---|---|-----|
| Kim, 2018             | 0 | 1 | 1 | 0 | 1 | 1 | 1 | 1 | 6/8 |
| Koyanagi, 2016        | 1 | 1 | 1 | 1 | 1 | 1 | 0 | 1 | 7/8 |
| Kurtyka, 2016         | 0 | 0 | 0 | 1 | 1 | 1 | 1 | 1 | 5/8 |
| Lo-Ciganic, 2015      | 0 | 0 | 1 | 1 | 1 | 1 | 1 | 1 | 6/8 |
| Lo-Ciganic, 2016      | 0 | 0 | 1 | 1 | 1 | 1 | 1 | 1 | 6/8 |
| Lokhandwala, 2016     | 0 | 0 | 1 | 1 | 1 | 1 | 1 | 1 | 6/8 |
| Lopez-Simarro, 2016   | 1 | 1 | 0 | 1 | 0 | 1 | 0 | 1 | 5/8 |
| Manteuffel, 2014      | 0 | 1 | 1 | 1 | 1 | 1 | 1 | 1 | 7/8 |
| Mhatre, 2016          | 0 | 1 | 1 | 0 | 1 | 1 | 1 | 1 | 6/8 |
| Miller, 2015          | 0 | 1 | 1 | 1 | 1 | 1 | 1 | 1 | 7/8 |
| Min, 2019             | 0 | 0 | 1 | 0 | 1 | 1 | 1 | 1 | 5/8 |
| Naffaa, 2020          | 0 | 1 | 1 | 1 | 1 | 1 | 1 | 1 | 7/8 |
| Nichols, 2016         | 0 | 1 | 0 | 1 | 0 | 1 | 1 | 1 | 5/8 |
| Nichols, 2018         | 0 | 1 | 0 | 1 | 1 | 1 | 1 | 1 | 6/8 |
| Nigam, 2012           | 1 | 1 | 1 | 1 | 0 | 1 | 1 | 1 | 7/8 |
| Nishimura, 2019a      | 0 | 0 | 1 | 1 | 1 | 1 | 1 | 1 | 6/8 |
| Nishimura, 2019b      | 1 | 0 | 1 | 1 | 1 | 1 | 1 | 1 | 7/8 |
| Ofori-Asenso, 2019a   | 0 | 1 | 1 | 1 | 1 | 1 | 1 | 1 | 7/8 |
| Ofori-Asenso, 2019b   | 0 | 1 | 1 | 1 | 1 | 1 | 1 | 1 | 7/8 |
| Oh, 2020              | 0 | 1 | 1 | 1 | 1 | 1 | 1 | 1 | 7/8 |
| O'Shea, 2013          | 0 | 1 | 1 | 1 | 1 | 1 | 1 | 1 | 7/8 |
| O'Shea, 2015          | 0 | 1 | 1 | 1 | 1 | 1 | 1 | 1 | 7/8 |
| Oung, 2017            | 0 | 1 | 1 | 1 | 1 | 1 | 1 | 1 | 7/8 |
| Quilliam, 2013        | 0 | 1 | 1 | 1 | 1 | 1 | 1 | 1 | 7/8 |
| Rascati, 2017         | 1 | 1 | 1 | 1 | 1 | 1 | 1 | 1 | 8/8 |
| Rinne, 2015           | 0 | 0 | 1 | 1 | 0 | 1 | 0 | 1 | 4/8 |
| Romagnoli, 2021       | 1 | 1 | 1 | 1 | 0 | 1 | 1 | 1 | 7/8 |
| Sacks, 2013           | 0 | 0 | 0 | 1 | 1 | 1 | 1 | 1 | 5/8 |
| Sacks, 2015           | 0 | 0 | 1 | 1 | 1 | 1 | 1 | 1 | 6/8 |
| Sattler, 2014         | 0 | 0 | 1 | 1 | 1 | 1 | 0 | 1 | 5/8 |
| Saundankar, 2016      | 0 | 1 | 1 | 1 | 1 | 1 | 1 | 1 | 7/8 |
| Schwab, 2019          | 0 | 1 | 0 | 1 | 1 | 1 | 1 | 1 | 6/8 |
| Shields, 2020         | 0 | 1 | 1 | 1 | 1 | 1 | 1 | 1 | 7/8 |
| Sicras-Mainar, 2014   | 0 | 0 | 1 | 1 | 0 | 1 | 1 | 1 | 5/8 |
| Simard, 2015          | 0 | 1 | 1 | 1 | 1 | 1 | 1 | 1 | 7/8 |
| Simard, 2018          | 0 | 1 | 1 | 1 | 1 | 1 | 0 | 1 | 6/8 |
| Simon-Tuval, 2018     | 0 | 1 | 0 | 1 | 1 | 1 | 0 | 1 | 5/8 |
| Singhal, 2019         | 0 | 1 | 1 | 1 | 1 | 1 | 1 | 1 | 7/8 |
| Taira, 2017           | 1 | 1 | 1 | 1 | 1 | 1 | 1 | 1 | 8/8 |
| Tanabe, 2017          | 0 | 1 | 0 | 1 | 0 | 1 | 1 | 1 | 5/8 |
| Tang, 2020            | 0 | 1 | 1 | 1 | 1 | 1 | 1 | 1 | 7/8 |
| Tunceli, 2015a        | 0 | 1 | 1 | 1 | 1 | 1 | 1 | 1 | 7/8 |
| Tunceli, 2015b        | 1 | 1 | 1 | 1 | 1 | 1 | 1 | 1 | 8/8 |
| Vichayanrat, 2013     | 1 | 1 | 1 | 0 | 0 | 1 | 1 | 1 | 6/8 |
| Vittorino Gaddi, 2014 | 0 | 0 | 1 | 1 | 1 | 1 | 1 | 1 | 6/8 |
| Vlacho, 2021          | 0 | 0 | 1 | 1 | 1 | 1 | 1 | 1 | 6/8 |
| White, 2012           | 1 | 1 | 1 | 0 | 1 | 1 | 0 | 1 | 6/8 |
| Wong, 2011            | 1 | 1 | 1 | 1 | 1 | 1 | 0 | 1 | 7/8 |
| Wong, 2012            | 1 | 0 | 1 | 1 | 1 | 1 | 0 | 1 | 6/8 |
| Wong, 2014            | 1 | 0 | 1 | 1 | 1 | 1 | 1 | 1 | 7/8 |
| Zhu, 2015             | 1 | 1 | 1 | 1 | 1 | 1 | 1 | 1 | 8/8 |
| Zomahoun, 2016        | 1 | 1 | 0 | 1 | 1 | 1 | 0 | 1 | 6/8 |

Figure S1. Forest plot of proportions of adherent patients towards OADs and relative confidence intervals.

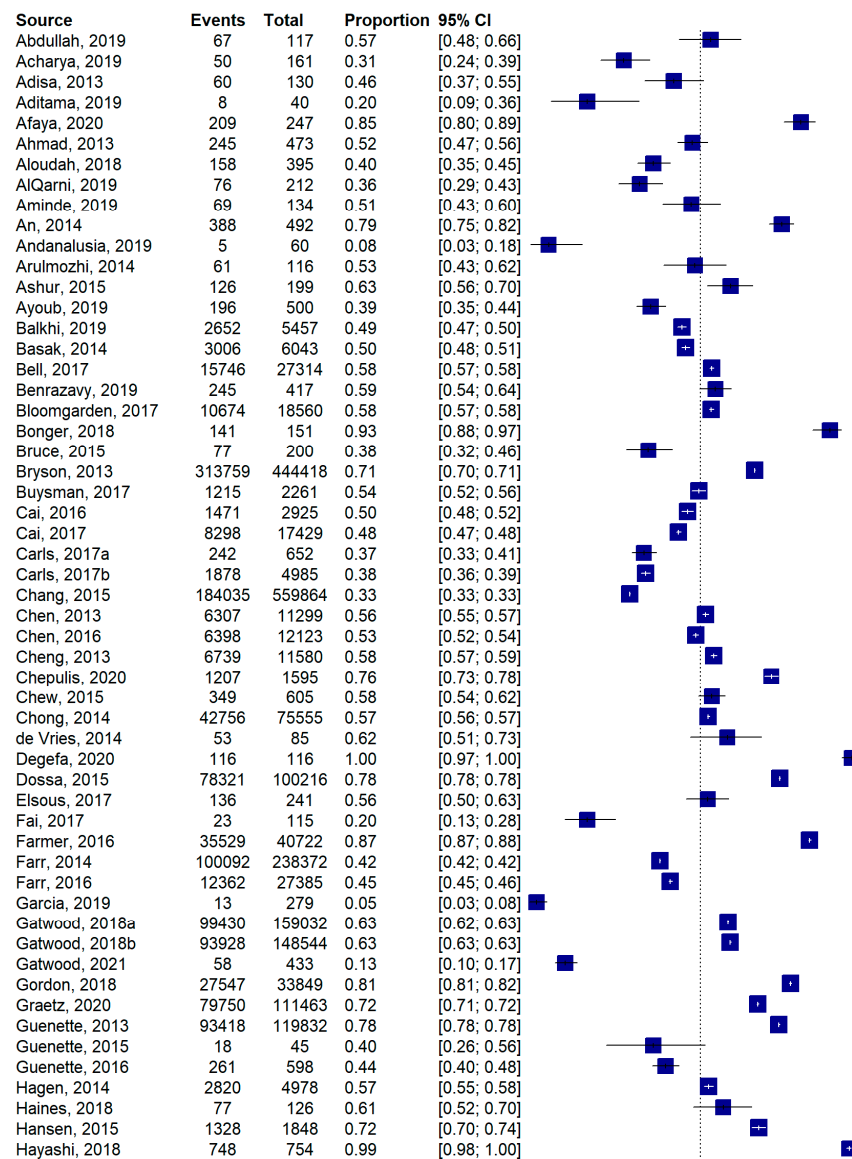

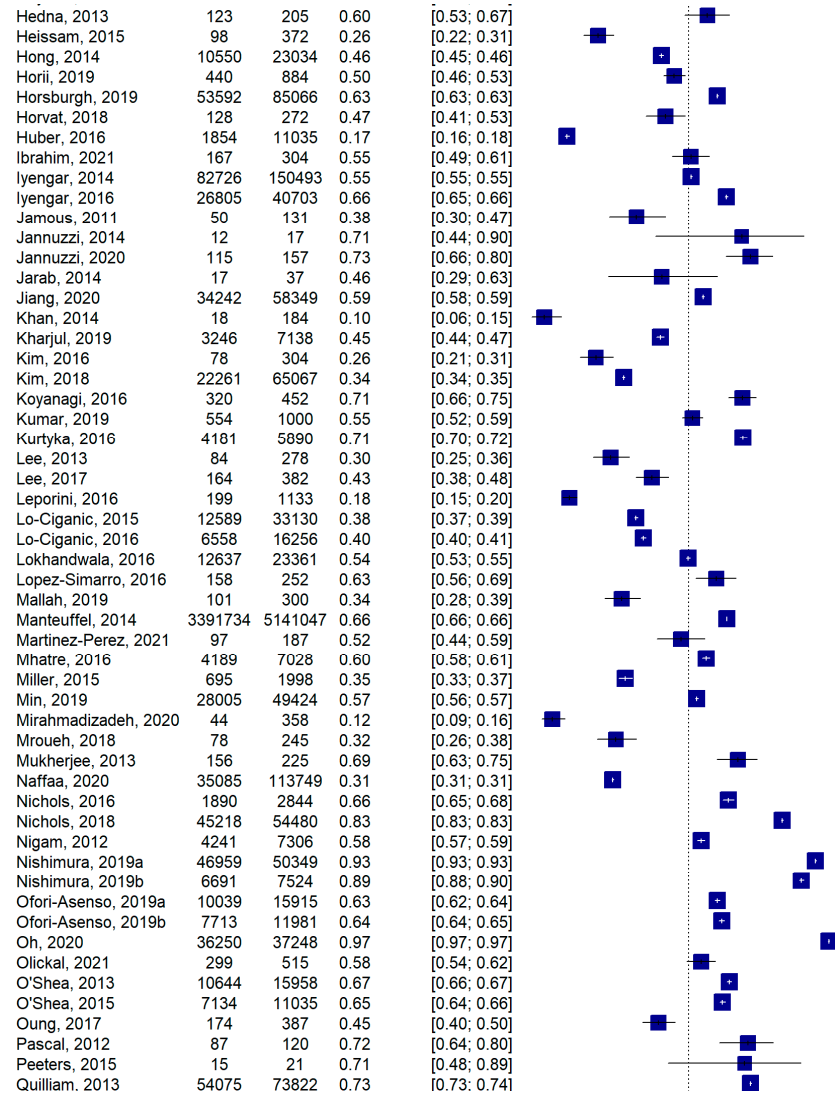

|                       |        |          |      |              |
|-----------------------|--------|----------|------|--------------|
| Rahmatullah, 2021     | 66     | 198      | 0.33 | [0.27; 0.40] |
| Rana, 2017            | 54     | 145      | 0.37 | [0.29; 0.46] |
| Ranashinge, 2018      | 93     | 212      | 0.44 | [0.37; 0.51] |
| Rascati, 2017         | 13040  | 26089    | 0.50 | [0.49; 0.51] |
| Rathish, 2019         | 46     | 200      | 0.23 | [0.17; 0.29] |
| Reach, 2011           | 81     | 90       | 0.90 | [0.82; 0.95] |
| Reach, 2018           | 489    | 1084     | 0.45 | [0.42; 0.48] |
| Rinne, 2015           | 29127  | 40766    | 0.71 | [0.71; 0.72] |
| Romagnoli, 2021       | 9899   | 29952    | 0.33 | [0.33; 0.34] |
| Sacks, 2013           | 32218  | 49642    | 0.65 | [0.64; 0.65] |
| Sacks, 2015           | 6130   | 12771    | 0.48 | [0.47; 0.49] |
| Sankar, 2015          | 75     | 317      | 0.24 | [0.19; 0.29] |
| Saraiva, 2020         | 54     | 250      | 0.22 | [0.17; 0.27] |
| Satirapoj, 2020       | 315    | 659      | 0.48 | [0.44; 0.52] |
| Sattler, 2014         | 84     | 243      | 0.35 | [0.29; 0.41] |
| Saundankar, 2016      | 144216 | 238402   | 0.60 | [0.60; 0.61] |
| Schwab, 2019          | 29733  | 38614    | 0.77 | [0.77; 0.77] |
| Shields, 2020         | 19664  | 24400    | 0.81 | [0.80; 0.81] |
| Shrestha, 2013        | 54     | 90       | 0.60 | [0.49; 0.70] |
| Sicras-Mainar, 2014   | 507    | 987      | 0.51 | [0.48; 0.55] |
| Simard, 2015          | 107355 | 160231   | 0.67 | [0.67; 0.67] |
| Simard, 2018          | 34890  | 52188    | 0.67 | [0.66; 0.67] |
| Simon-Tuval, 2018     | 158    | 308      | 0.51 | [0.46; 0.57] |
| Singhal, 2019         | 356    | 750      | 0.47 | [0.44; 0.51] |
| Taira, 2017           | 3819   | 5163     | 0.74 | [0.73; 0.75] |
| Tanabe, 2017          | 4420   | 7108     | 0.62 | [0.61; 0.63] |
| Tandon, 2015          | 17     | 66       | 0.26 | [0.16; 0.38] |
| Tang, 2020            | 48922  | 111186   | 0.44 | [0.44; 0.44] |
| Tiv, 2012             | 1158   | 2859     | 0.41 | [0.39; 0.42] |
| Tunceli, 2015a        | 78764  | 133499   | 0.59 | [0.59; 0.59] |
| Tunceli, 2015b        | 3772   | 6276     | 0.60 | [0.59; 0.61] |
| Vichayanrat, 2013     | 832    | 1064     | 0.78 | [0.76; 0.81] |
| Vietri, 2016          | 779    | 2030     | 0.38 | [0.36; 0.41] |
| Vittorino Gaddi, 2014 | 73828  | 169375   | 0.44 | [0.43; 0.44] |
| Vlacho, 2021          | 36118  | 75808    | 0.48 | [0.47; 0.48] |
| Waari, 2018           | 67     | 129      | 0.52 | [0.43; 0.61] |
| Walz, 2014            | 271    | 430      | 0.63 | [0.58; 0.68] |
| White, 2012           | 44     | 60       | 0.73 | [0.60; 0.84] |
| Wong, 2011            | 23997  | 26782    | 0.90 | [0.89; 0.90] |
| Wong, 2012            | 313759 | 444418   | 0.71 | [0.70; 0.71] |
| Wong, 2014            | 14068  | 26051    | 0.54 | [0.53; 0.55] |
| Wong, 2015            | 383    | 565      | 0.68 | [0.64; 0.72] |
| Wu, 2016              | 59     | 130      | 0.45 | [0.37; 0.54] |
| Zhou, 2013            | 39     | 87       | 0.45 | [0.34; 0.56] |
| Zhu, 2015             | 2269   | 24067    | 0.09 | [0.09; 0.10] |
| Zomahoun, 2016        | 293    | 340      | 0.86 | [0.82; 0.90] |
| Zongo, 2016           | 66     | 153      | 0.43 | [0.35; 0.51] |
| Total                 |        | 10041928 | 0.54 | [0.51; 0.58] |

Heterogeneity:  $\chi^2_{155} = 673989.71$  ( $P < .001$ ),  $I^2 = 100\%$

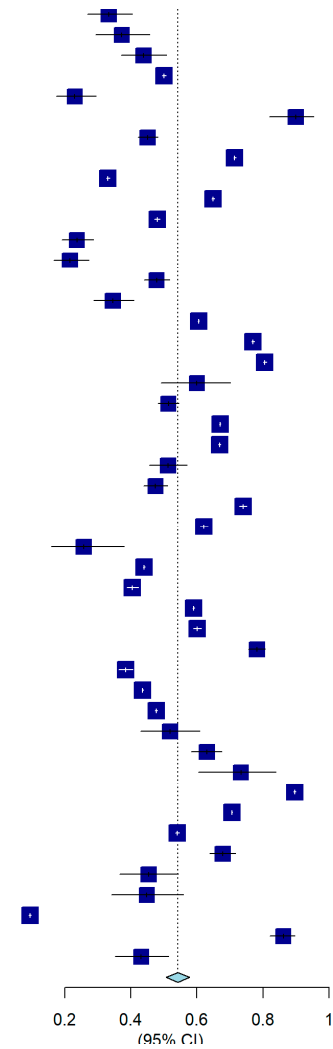

Figure S2. Forest plot of proportions, and relative confidence intervals, according with risk of bias.

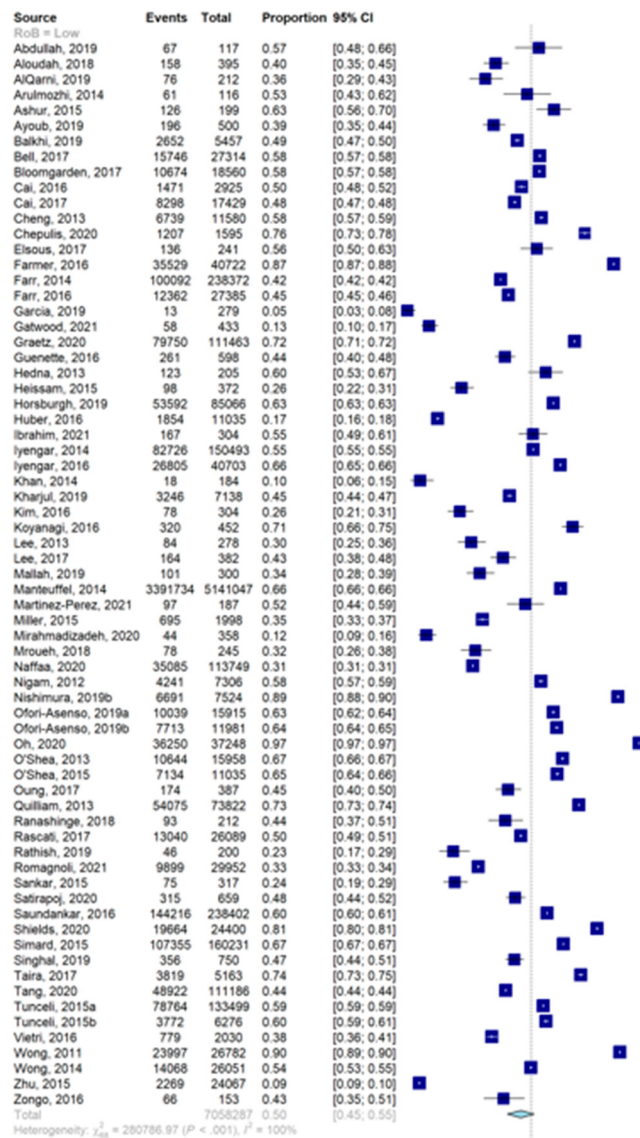

RoB = Moderate

|                       |        |         |      |              |
|-----------------------|--------|---------|------|--------------|
| Acharya, 2019         | 50     | 161     | 0.31 | [0.24; 0.39] |
| Adisa, 2013           | 60     | 130     | 0.46 | [0.37; 0.55] |
| Afaya, 2020           | 209    | 247     | 0.85 | [0.80; 0.89] |
| Ahmad, 2013           | 245    | 473     | 0.52 | [0.47; 0.56] |
| Aminde, 2019          | 69     | 134     | 0.51 | [0.43; 0.60] |
| An, 2014              | 388    | 492     | 0.79 | [0.75; 0.82] |
| Andanulisia, 2019     | 5      | 60      | 0.08 | [0.03; 0.18] |
| Basak, 2014           | 3006   | 6043    | 0.50 | [0.48; 0.51] |
| Benrazavi, 2019       | 245    | 417     | 0.59 | [0.54; 0.64] |
| Bonger, 2018          | 141    | 151     | 0.93 | [0.88; 0.97] |
| Bruce, 2015           | 77     | 200     | 0.38 | [0.32; 0.46] |
| Buysman, 2017         | 1215   | 2261    | 0.54 | [0.52; 0.56] |
| Carls, 2017a          | 242    | 652     | 0.37 | [0.33; 0.41] |
| Carls, 2017b          | 1878   | 4985    | 0.38 | [0.36; 0.39] |
| Chang, 2015           | 184035 | 559864  | 0.33 | [0.33; 0.33] |
| Chen, 2016            | 6398   | 12123   | 0.53 | [0.52; 0.54] |
| Chew, 2015            | 349    | 605     | 0.58 | [0.54; 0.62] |
| Chong, 2014           | 42756  | 75555   | 0.57 | [0.56; 0.57] |
| de Vries, 2014        | 53     | 85      | 0.62 | [0.51; 0.73] |
| Dossa, 2015           | 78321  | 100216  | 0.78 | [0.78; 0.78] |
| Gatwood, 2018a        | 99430  | 159032  | 0.63 | [0.62; 0.63] |
| Gatwood, 2018b        | 93928  | 148544  | 0.63 | [0.63; 0.63] |
| Gordon, 2018          | 27547  | 33849   | 0.81 | [0.81; 0.82] |
| Guenette, 2013        | 93418  | 119832  | 0.78 | [0.78; 0.78] |
| Guenette, 2015        | 18     | 45      | 0.40 | [0.26; 0.56] |
| Hagen, 2014           | 2820   | 4978    | 0.57 | [0.55; 0.58] |
| Haines, 2018          | 77     | 126     | 0.61 | [0.52; 0.70] |
| Hansen, 2015          | 1328   | 1848    | 0.72 | [0.70; 0.74] |
| Hong, 2014            | 10550  | 23034   | 0.46 | [0.45; 0.46] |
| Horii, 2019           | 440    | 884     | 0.50 | [0.46; 0.53] |
| Jannuzzi, 2014        | 12     | 17      | 0.71 | [0.44; 0.90] |
| Jannuzzi, 2020        | 115    | 157     | 0.73 | [0.66; 0.80] |
| Jarab, 2014           | 17     | 37      | 0.46 | [0.29; 0.63] |
| Jiang, 2020           | 34242  | 58349   | 0.59 | [0.58; 0.59] |
| Kim, 2018             | 22261  | 65067   | 0.34 | [0.34; 0.35] |
| Kurtyka, 2016         | 4181   | 5890    | 0.71 | [0.70; 0.72] |
| Leporini, 2016        | 199    | 1133    | 0.18 | [0.15; 0.20] |
| Lo-Ciganic, 2015      | 12589  | 33130   | 0.38 | [0.37; 0.39] |
| Lo-Ciganic, 2016      | 6558   | 16256   | 0.40 | [0.40; 0.41] |
| Lokhandwala, 2016     | 12637  | 23361   | 0.54 | [0.53; 0.55] |
| Lopez-Simarro, 2016   | 158    | 252     | 0.63 | [0.56; 0.69] |
| Mhatre, 2016          | 4189   | 7028    | 0.60 | [0.58; 0.61] |
| Min, 2019             | 28005  | 49424   | 0.57 | [0.56; 0.57] |
| Mukherjee, 2013       | 156    | 225     | 0.69 | [0.63; 0.75] |
| Nichols, 2016         | 1890   | 2844    | 0.66 | [0.65; 0.68] |
| Nichols, 2018         | 45218  | 54480   | 0.83 | [0.83; 0.83] |
| Nishimura, 2019a      | 46959  | 50349   | 0.93 | [0.93; 0.93] |
| Olickal, 2021         | 299    | 515     | 0.58 | [0.54; 0.62] |
| Rahmatullah, 2021     | 66     | 198     | 0.33 | [0.27; 0.40] |
| Reach, 2018           | 489    | 1084    | 0.45 | [0.42; 0.48] |
| Sacks, 2013           | 32218  | 49642   | 0.65 | [0.64; 0.65] |
| Sacks, 2015           | 6130   | 12771   | 0.48 | [0.47; 0.49] |
| Sarava, 2020          | 54     | 250     | 0.22 | [0.17; 0.27] |
| Sattler, 2014         | 84     | 243     | 0.35 | [0.29; 0.41] |
| Schwab, 2019          | 29733  | 38614   | 0.77 | [0.77; 0.77] |
| Sicras-Mainar, 2014   | 507    | 987     | 0.51 | [0.48; 0.55] |
| Simard, 2018          | 34890  | 52188   | 0.67 | [0.66; 0.67] |
| Simon-Tuval, 2018     | 158    | 308     | 0.51 | [0.46; 0.57] |
| Tanabe, 2017          | 4420   | 7108    | 0.62 | [0.61; 0.63] |
| Tandon, 2015          | 17     | 66      | 0.26 | [0.16; 0.38] |
| Tiv, 2012             | 1158   | 2859    | 0.41 | [0.39; 0.42] |
| Vichayanrat, 2013     | 832    | 1064    | 0.78 | [0.76; 0.81] |
| Vittorino Gaddi, 2014 | 73828  | 169375  | 0.44 | [0.43; 0.44] |
| Vlachos, 2021         | 36118  | 75808   | 0.48 | [0.47; 0.48] |
| Waari, 2018           | 67     | 129     | 0.52 | [0.43; 0.61] |
| Waltz, 2014           | 271    | 430     | 0.63 | [0.58; 0.68] |
| White, 2012           | 44     | 60      | 0.73 | [0.60; 0.84] |
| Wong, 2012            | 313759 | 444418  | 0.71 | [0.70; 0.71] |
| Wong, 2015            | 383    | 565     | 0.68 | [0.64; 0.72] |
| Wu, 2016              | 59     | 130     | 0.45 | [0.37; 0.54] |
| Zomahoun, 2016        | 293    | 340     | 0.86 | [0.82; 0.90] |
| Total                 |        | 2484177 | 0.57 | [0.52; 0.61] |

Heterogeneity:  $\chi^2_{10} = 342012.48$  ( $P < .001$ ),  $I^2 = 100\%$

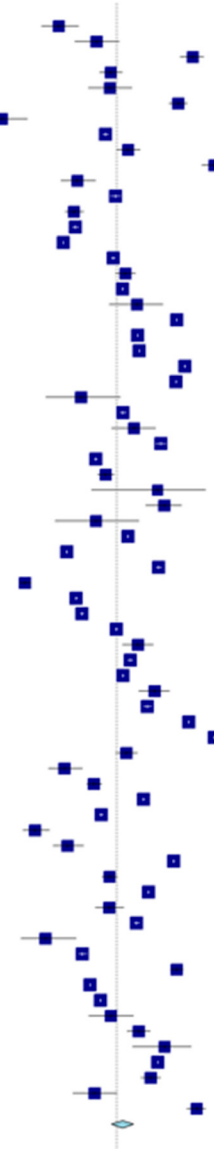

|                                                                         |          |        |      |              |
|-------------------------------------------------------------------------|----------|--------|------|--------------|
| RoB = High                                                              |          |        |      |              |
| Aditama, 2019                                                           | 8        | 40     | 0.20 | [0.09; 0.36] |
| Bryson, 2013                                                            | 313759   | 444418 | 0.71 | [0.70; 0.71] |
| Chen, 2013                                                              | 6307     | 11299  | 0.56 | [0.55; 0.57] |
| Degefa, 2020                                                            | 116      | 116    | 1.00 | [0.97; 1.00] |
| Fai, 2017                                                               | 23       | 115    | 0.20 | [0.13; 0.28] |
| Hayashi, 2018                                                           | 748      | 754    | 0.99 | [0.98; 1.00] |
| Horvat, 2018                                                            | 128      | 272    | 0.47 | [0.41; 0.53] |
| Jamous, 2011                                                            | 50       | 131    | 0.38 | [0.30; 0.47] |
| Kumar, 2019                                                             | 554      | 1000   | 0.55 | [0.52; 0.59] |
| Pascal, 2012                                                            | 87       | 120    | 0.72 | [0.64; 0.80] |
| Peeters, 2015                                                           | 15       | 21     | 0.71 | [0.48; 0.89] |
| Rana, 2017                                                              | 54       | 145    | 0.37 | [0.29; 0.46] |
| Reach, 2011                                                             | 81       | 90     | 0.90 | [0.82; 0.95] |
| Rinne, 2015                                                             | 29127    | 40766  | 0.71 | [0.71; 0.72] |
| Shrestha, 2013                                                          | 54       | 90     | 0.60 | [0.49; 0.70] |
| Zhou, 2013                                                              | 39       | 87     | 0.45 | [0.34; 0.56] |
| Total                                                                   | 499464   | 0.63   |      | [0.48; 0.77] |
| Heterogeneity: $\chi^2_{15} = 2411.59$ ( $P < .001$ ), $I^2 = 99\%$     |          |        |      |              |
| Total                                                                   | 10041928 | 0.54   |      | [0.51; 0.58] |
| Heterogeneity: $\chi^2_{155} = 673989.71$ ( $P < .001$ ), $I^2 = 100\%$ |          |        |      |              |
| Test for subgroup differences: $\chi^2_2 = 4.67$ ( $P = .10$ )          |          |        |      |              |

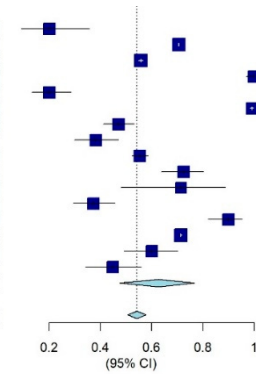

Figure S3. Forest plot of proportions, and relative confidence intervals, of adherent patients stratified for gender.

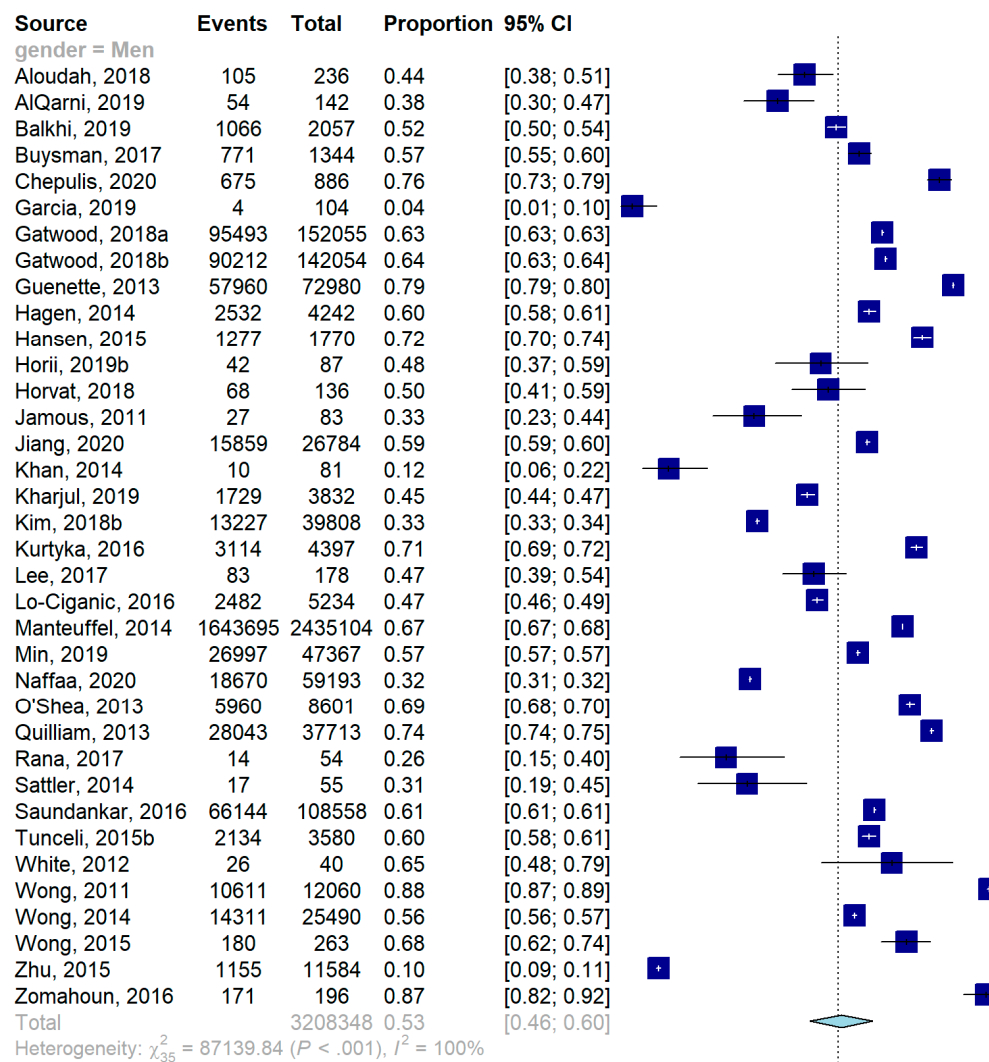

gender = Women

|                                                                        |         |         |      |              |
|------------------------------------------------------------------------|---------|---------|------|--------------|
| Aloudah, 2018                                                          | 53      | 159     | 0.33 | [0.26; 0.41] |
| AlQarni, 2019                                                          | 22      | 70      | 0.31 | [0.21; 0.44] |
| Balkhi, 2019                                                           | 1586    | 3400    | 0.47 | [0.45; 0.48] |
| Buysman, 2017                                                          | 444     | 917     | 0.48 | [0.45; 0.52] |
| Chepulis, 2020                                                         | 532     | 709     | 0.75 | [0.72; 0.78] |
| Garcia, 2019                                                           | 9       | 175     | 0.05 | [0.02; 0.10] |
| Gatwood, 2018a                                                         | 3937    | 6977    | 0.56 | [0.55; 0.58] |
| Gatwood, 2018b                                                         | 3716    | 6490    | 0.57 | [0.56; 0.58] |
| Guenette, 2013                                                         | 61872   | 78193   | 0.79 | [0.79; 0.79] |
| Hagen, 2014                                                            | 288     | 736     | 0.39 | [0.36; 0.43] |
| Hansen, 2015                                                           | 51      | 78      | 0.65 | [0.54; 0.76] |
| Horii, 2019b                                                           | 495     | 797     | 0.62 | [0.59; 0.65] |
| Horvat, 2018                                                           | 101     | 187     | 0.54 | [0.47; 0.61] |
| Jamous, 2011                                                           | 23      | 47      | 0.49 | [0.34; 0.64] |
| Jiang, 2020                                                            | 18383   | 31565   | 0.58 | [0.58; 0.59] |
| Khan, 2014                                                             | 8       | 103     | 0.08 | [0.03; 0.15] |
| Kharjul, 2019                                                          | 1517    | 3305    | 0.46 | [0.44; 0.48] |
| Kim, 2018b                                                             | 9034    | 25259   | 0.36 | [0.35; 0.36] |
| Kurtyka, 2016                                                          | 1068    | 1493    | 0.72 | [0.69; 0.74] |
| Lee, 2017                                                              | 81      | 204     | 0.40 | [0.33; 0.47] |
| Lo-Ciganic, 2016                                                       | 4076    | 11022   | 0.37 | [0.36; 0.38] |
| Manteuffel, 2014                                                       | 1748039 | 2705943 | 0.65 | [0.65; 0.65] |
| Min, 2019                                                              | 1008    | 2057    | 0.49 | [0.47; 0.51] |
| Naffaa, 2020                                                           | 16415   | 54556   | 0.30 | [0.30; 0.30] |
| O'Shea, 2013                                                           | 4679    | 7357    | 0.64 | [0.62; 0.65] |
| Quilliam, 2013                                                         | 26032   | 36109   | 0.72 | [0.72; 0.73] |
| Rana, 2017                                                             | 40      | 91      | 0.44 | [0.34; 0.55] |
| Sattler, 2014                                                          | 67      | 188     | 0.36 | [0.29; 0.43] |
| Saundankar, 2016                                                       | 78072   | 129844  | 0.60 | [0.60; 0.60] |
| Tunceli, 2015b                                                         | 1639    | 2696    | 0.61 | [0.59; 0.63] |
| White, 2012                                                            | 18      | 20      | 0.90 | [0.68; 0.99] |
| Wong, 2011                                                             | 13396   | 14722   | 0.91 | [0.91; 0.91] |
| Wong, 2014                                                             | 257     | 561     | 0.46 | [0.42; 0.50] |
| Wong, 2015                                                             | 203     | 302     | 0.67 | [0.62; 0.72] |
| Zhu, 2015                                                              | 1114    | 12483   | 0.09 | [0.08; 0.09] |
| Zomahoun, 2016                                                         | 122     | 144     | 0.85 | [0.78; 0.90] |
| Total                                                                  |         | 3138959 | 0.52 | [0.44; 0.59] |
| Heterogeneity: $\chi^2_{35} = 78180.72$ ( $P < .001$ ), $I^2 = 100\%$  |         |         |      |              |
| Total                                                                  |         | 6347307 | 0.52 | [0.47; 0.58] |
| Heterogeneity: $\chi^2_{71} = 167998.13$ ( $P < .001$ ), $I^2 = 100\%$ |         |         |      |              |
| Test for subgroup differences: $\chi^2_1 = 0.07$ ( $P = .78$ )         |         |         |      |              |

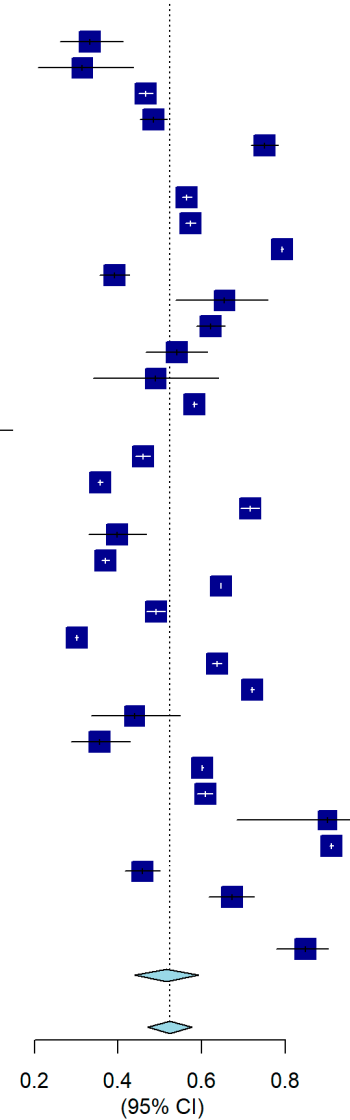

Figure S4. Forest plot of proportions, and relative confidence intervals, of adherent patients stratified for age category.

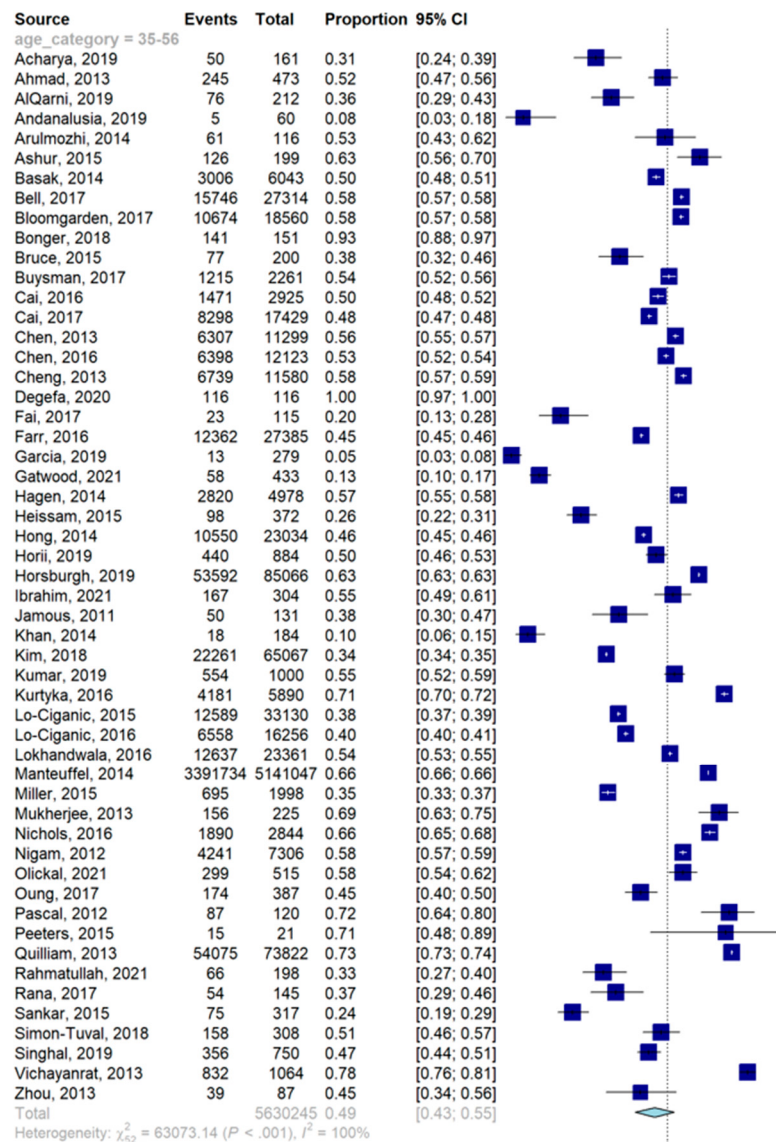

age\_category = 56-63

|                                                                        |        |         |      |              |
|------------------------------------------------------------------------|--------|---------|------|--------------|
| Abdullah, 2019                                                         | 67     | 117     | 0.57 | [0.48; 0.66] |
| Adisa, 2013                                                            | 60     | 130     | 0.46 | [0.37; 0.55] |
| Afaya, 2020                                                            | 209    | 247     | 0.85 | [0.80; 0.89] |
| Aloudah, 2018                                                          | 158    | 395     | 0.40 | [0.35; 0.45] |
| Aminde, 2019                                                           | 69     | 134     | 0.51 | [0.43; 0.60] |
| An, 2014                                                               | 388    | 492     | 0.79 | [0.75; 0.82] |
| Ayoub, 2019                                                            | 196    | 500     | 0.39 | [0.35; 0.44] |
| Balkhi, 2019                                                           | 2652   | 5457    | 0.49 | [0.47; 0.50] |
| Benrazavy, 2019                                                        | 245    | 417     | 0.59 | [0.54; 0.64] |
| Carls, 2017a                                                           | 242    | 652     | 0.37 | [0.33; 0.41] |
| Carls, 2017b                                                           | 1878   | 4985    | 0.38 | [0.36; 0.39] |
| Chang, 2015                                                            | 184035 | 559864  | 0.33 | [0.33; 0.33] |
| Chew, 2015                                                             | 349    | 605     | 0.58 | [0.54; 0.62] |
| Chong, 2014                                                            | 42756  | 75555   | 0.57 | [0.56; 0.57] |
| Elsous, 2017                                                           | 136    | 241     | 0.56 | [0.50; 0.63] |
| Farr, 2014                                                             | 100092 | 238372  | 0.42 | [0.42; 0.42] |
| Gatwood, 2018a                                                         | 99430  | 159032  | 0.63 | [0.62; 0.63] |
| Gatwood, 2018b                                                         | 93928  | 148544  | 0.63 | [0.63; 0.63] |
| Gordon, 2018                                                           | 27547  | 33849   | 0.81 | [0.81; 0.82] |
| Guenette, 2016                                                         | 261    | 598     | 0.44 | [0.40; 0.48] |
| Haines, 2018                                                           | 77     | 126     | 0.61 | [0.52; 0.70] |
| Jannuzzi, 2014                                                         | 12     | 17      | 0.71 | [0.44; 0.90] |
| Jannuzzi, 2020                                                         | 115    | 157     | 0.73 | [0.66; 0.80] |
| Kharjul, 2019                                                          | 3246   | 7138    | 0.45 | [0.44; 0.47] |
| Kim, 2016                                                              | 78     | 304     | 0.26 | [0.21; 0.31] |
| Lee, 2013                                                              | 84     | 278     | 0.30 | [0.25; 0.36] |
| Lee, 2017                                                              | 164    | 382     | 0.43 | [0.38; 0.48] |
| Mallah, 2019                                                           | 101    | 300     | 0.34 | [0.28; 0.39] |
| Min, 2019                                                              | 28005  | 49424   | 0.57 | [0.56; 0.57] |
| Mirahmadizadeh, 2020                                                   | 44     | 358     | 0.12 | [0.09; 0.16] |
| Mroueh, 2018                                                           | 78     | 245     | 0.32 | [0.26; 0.38] |
| Naffaa, 2020                                                           | 35085  | 113749  | 0.31 | [0.31; 0.31] |
| Nishimura, 2019a                                                       | 46959  | 50349   | 0.93 | [0.93; 0.93] |
| Nishimura, 2019b                                                       | 6691   | 7524    | 0.89 | [0.88; 0.90] |
| Ofori-Asenso, 2019a                                                    | 10039  | 15915   | 0.63 | [0.62; 0.64] |
| Ofori-Asenso, 2019b                                                    | 7713   | 11981   | 0.64 | [0.64; 0.65] |
| O'Shea, 2013                                                           | 10644  | 15958   | 0.67 | [0.66; 0.67] |
| Ranashinge, 2018                                                       | 93     | 212     | 0.44 | [0.37; 0.51] |
| Rascati, 2017                                                          | 13040  | 26089   | 0.50 | [0.49; 0.51] |
| Rathish, 2019                                                          | 46     | 200     | 0.23 | [0.17; 0.29] |
| Reach, 2011                                                            | 81     | 90      | 0.90 | [0.82; 0.95] |
| Saraiva, 2020                                                          | 54     | 250     | 0.22 | [0.17; 0.27] |
| Shrestha, 2013                                                         | 54     | 90      | 0.60 | [0.49; 0.70] |
| Tandon, 2015                                                           | 17     | 66      | 0.26 | [0.16; 0.38] |
| Tunceli, 2015a                                                         | 78764  | 133499  | 0.59 | [0.59; 0.59] |
| Vietri, 2016                                                           | 779    | 2030    | 0.38 | [0.36; 0.41] |
| Vlach, 2021                                                            | 36118  | 75808   | 0.48 | [0.47; 0.48] |
| Waari, 2018                                                            | 67     | 129     | 0.52 | [0.43; 0.61] |
| Wong, 2015                                                             | 383    | 565     | 0.68 | [0.64; 0.72] |
| Wu, 2016                                                               | 59     | 130     | 0.45 | [0.37; 0.54] |
| Zomahoun, 2016                                                         | 293    | 340     | 0.86 | [0.82; 0.90] |
| Total                                                                  |        | 1743889 | 0.53 | [0.47; 0.59] |
| Heterogeneity: $\chi^2_{50} = 199691.23$ ( $P < .001$ ), $I^2 = 100\%$ |        |         |      |              |

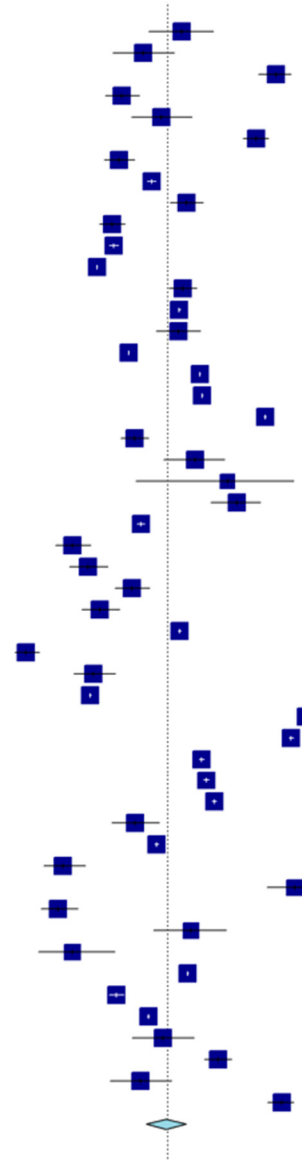

age\_category = 63-77

|                                                                         |        |         |      |              |
|-------------------------------------------------------------------------|--------|---------|------|--------------|
| Aditama, 2019                                                           | 8      | 40      | 0.20 | [0.09; 0.36] |
| Bryson, 2013                                                            | 313759 | 444418  | 0.71 | [0.70; 0.71] |
| Chepulis, 2020                                                          | 1207   | 1595    | 0.76 | [0.73; 0.78] |
| de Vries, 2014                                                          | 53     | 85      | 0.62 | [0.51; 0.73] |
| Dossa, 2015                                                             | 78321  | 100216  | 0.78 | [0.78; 0.78] |
| Farmer, 2016                                                            | 35529  | 40722   | 0.87 | [0.87; 0.88] |
| Graetz, 2020                                                            | 79750  | 111463  | 0.72 | [0.71; 0.72] |
| Guenette, 2015                                                          | 18     | 45      | 0.40 | [0.26; 0.56] |
| Hansen, 2015                                                            | 1328   | 1848    | 0.72 | [0.70; 0.74] |
| Hayashi, 2018                                                           | 748    | 754     | 0.99 | [0.98; 1.00] |
| Hedna, 2013                                                             | 123    | 205     | 0.60 | [0.53; 0.67] |
| Huber, 2016                                                             | 1854   | 11035   | 0.17 | [0.16; 0.18] |
| Iyengar, 2014                                                           | 82726  | 150493  | 0.55 | [0.55; 0.55] |
| Iyengar, 2016                                                           | 26805  | 40703   | 0.66 | [0.65; 0.66] |
| Jarab, 2014                                                             | 17     | 37      | 0.46 | [0.29; 0.63] |
| Jiang, 2020                                                             | 34242  | 58349   | 0.59 | [0.58; 0.59] |
| Koyanagi, 2016                                                          | 320    | 452     | 0.71 | [0.66; 0.75] |
| Leporini, 2016                                                          | 199    | 1133    | 0.18 | [0.15; 0.20] |
| Lopez-Simarro, 2016                                                     | 158    | 252     | 0.63 | [0.56; 0.69] |
| Martinez-Perez, 2021                                                    | 97     | 187     | 0.52 | [0.44; 0.59] |
| Mhatre, 2016                                                            | 4189   | 7028    | 0.60 | [0.58; 0.61] |
| Oh, 2020                                                                | 36250  | 37248   | 0.97 | [0.97; 0.97] |
| Reach, 2018                                                             | 489    | 1084    | 0.45 | [0.42; 0.48] |
| Rinne, 2015                                                             | 29127  | 40766   | 0.71 | [0.71; 0.72] |
| Romagnoli, 2021                                                         | 9899   | 29952   | 0.33 | [0.33; 0.34] |
| Sacks, 2013                                                             | 32218  | 49642   | 0.65 | [0.64; 0.65] |
| Sacks, 2015                                                             | 6130   | 12771   | 0.48 | [0.47; 0.49] |
| Satirapoj, 2020                                                         | 315    | 659     | 0.48 | [0.44; 0.52] |
| Sattler, 2014                                                           | 84     | 243     | 0.35 | [0.29; 0.41] |
| Saundankar, 2016                                                        | 144216 | 238402  | 0.60 | [0.60; 0.61] |
| Schwab, 2019                                                            | 29733  | 38614   | 0.77 | [0.77; 0.77] |
| Sicras-Mainar, 2014                                                     | 507    | 987     | 0.51 | [0.48; 0.55] |
| Simard, 2015                                                            | 107355 | 160231  | 0.67 | [0.67; 0.67] |
| Simard, 2018                                                            | 34890  | 52188   | 0.67 | [0.66; 0.67] |
| Taira, 2017                                                             | 3819   | 5163    | 0.74 | [0.73; 0.75] |
| Tanabe, 2017                                                            | 4420   | 7108    | 0.62 | [0.61; 0.63] |
| Tang, 2020                                                              | 48922  | 111186  | 0.44 | [0.44; 0.44] |
| Tiv, 2012                                                               | 1158   | 2859    | 0.41 | [0.39; 0.42] |
| Vittorino Gaddi, 2014                                                   | 73828  | 169375  | 0.44 | [0.43; 0.44] |
| Walz, 2014                                                              | 271    | 430     | 0.63 | [0.58; 0.68] |
| White, 2012                                                             | 44     | 60      | 0.73 | [0.60; 0.84] |
| Wong, 2012                                                              | 313759 | 444418  | 0.71 | [0.70; 0.71] |
| Wong, 2014                                                              | 14068  | 26051   | 0.54 | [0.53; 0.55] |
| Zhu, 2015                                                               | 2269   | 24067   | 0.09 | [0.09; 0.10] |
| Zongo, 2016                                                             | 66     | 153     | 0.43 | [0.35; 0.51] |
| Total                                                                   |        | 2424717 | 0.58 | [0.52; 0.65] |
| Heterogeneity: $\chi^2_{44} = 201623.73$ ( $P < .001$ ), $I^2 = 100\%$  |        |         |      |              |
| Total                                                                   |        | 9798851 | 0.53 | [0.50; 0.57] |
| Heterogeneity: $\chi^2_{148} = 630992.15$ ( $P < .001$ ), $I^2 = 100\%$ |        |         |      |              |
| Test for subgroup differences: $\chi^2_2 = 3.98$ ( $P = .14$ )          |        |         |      |              |

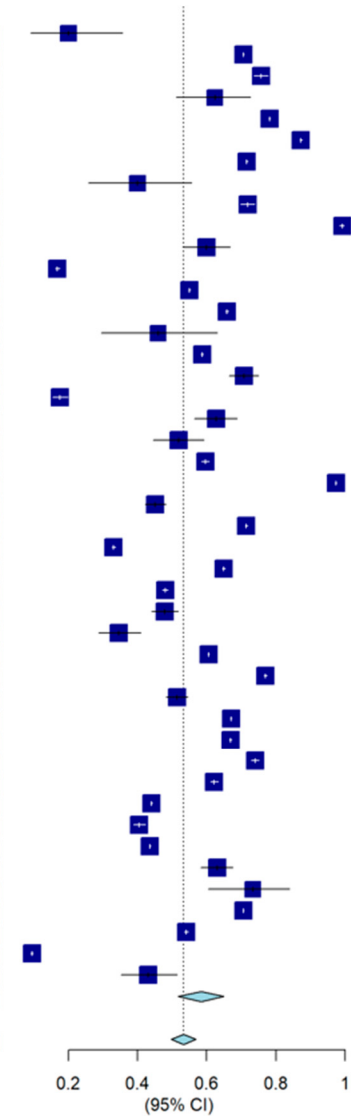

Figure S5. Forest plot of proportions, and relative confidence intervals, of adherent incident patients stratified for follow-up period.

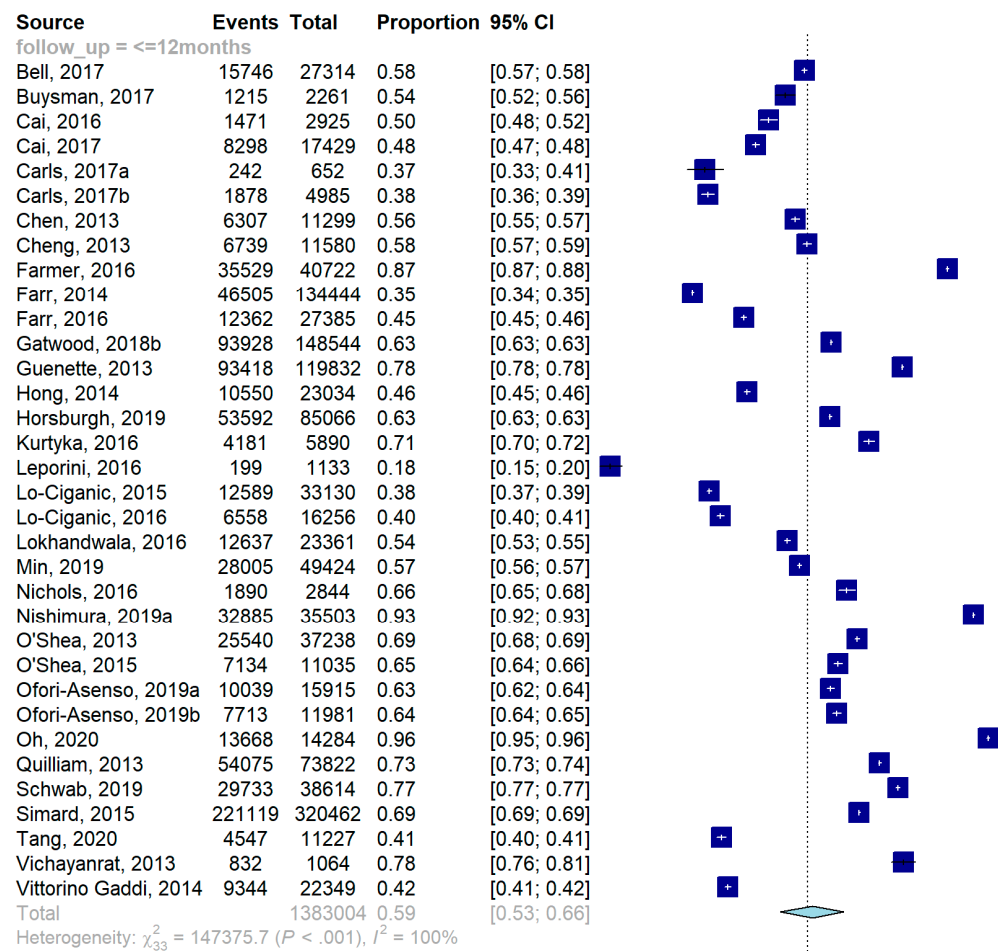

follow\_up = >12months

|                 |        |        |      |              |
|-----------------|--------|--------|------|--------------|
| Chen, 2013      | 47564  | 79093  | 0.60 | [0.60; 0.60] |
| Chen, 2016      | 6398   | 12123  | 0.53 | [0.52; 0.54] |
| Cheng, 2013     | 48071  | 81060  | 0.59 | [0.59; 0.60] |
| Farr, 2014      | 46505  | 134444 | 0.35 | [0.34; 0.35] |
| Gatwood, 2018b  | 87790  | 148544 | 0.59 | [0.59; 0.59] |
| Hong, 2014      | 44248  | 69102  | 0.64 | [0.64; 0.64] |
| Horii, 2019     | 440    | 884    | 0.50 | [0.46; 0.53] |
| Horsburgh, 2019 | 49338  | 85066  | 0.58 | [0.58; 0.58] |
| Kim, 2018       | 22261  | 65067  | 0.34 | [0.34; 0.35] |
| Schwab, 2019    | 22967  | 31848  | 0.72 | [0.72; 0.73] |
| Simard, 2015    | 104150 | 160231 | 0.65 | [0.65; 0.65] |
| Total           |        | 867462 | 0.55 | [0.48; 0.63] |

Heterogeneity:  $\chi^2_{10} = 50460.37$  ( $P < .001$ ),  $I^2 = 100\%$

Total 2250466 0.58 [0.53; 0.64]

Heterogeneity:  $\chi^2_{44} = 213018.13$  ( $P < .001$ ),  $I^2 = 100\%$

Test for subgroup differences:  $\chi^2_1 = 0.61$  ( $P = .43$ )

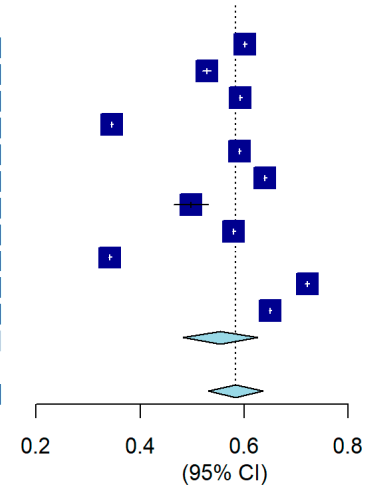

Figure S6. Forest plot of proportions, and relative confidence intervals, of adherent patients stratified for therapeutic class.

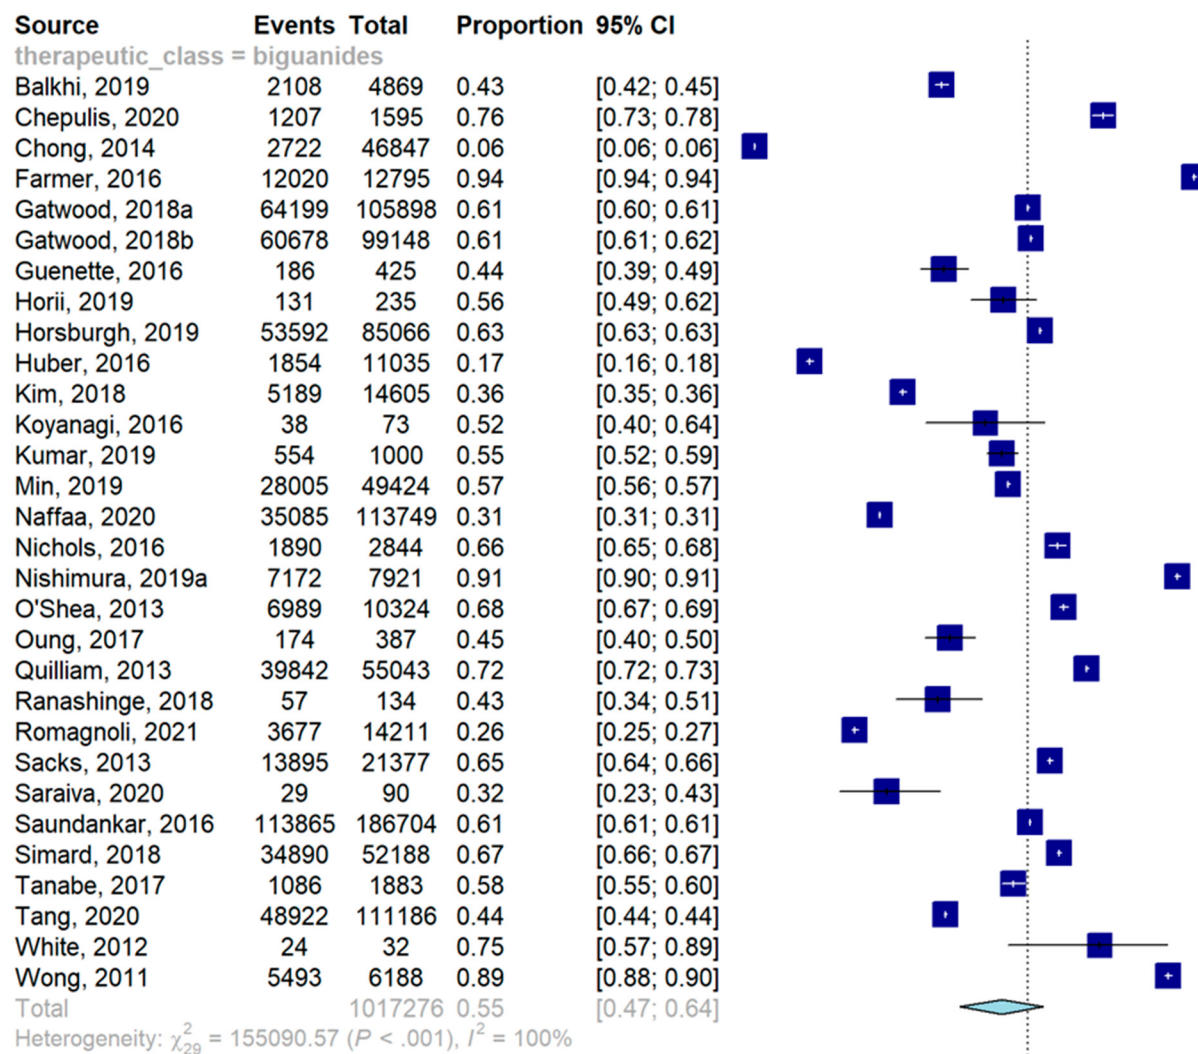

therapeutic\_class = insulin secretagogues

|                   |       |        |      |              |
|-------------------|-------|--------|------|--------------|
| Balkhi, 2019      | 543   | 947    | 0.57 | [0.54; 0.61] |
| Bell, 2017        | 8385  | 13657  | 0.61 | [0.61; 0.62] |
| Carls, 2017b      | 1094  | 2713   | 0.40 | [0.38; 0.42] |
| Chong, 2014       | 13651 | 26155  | 0.52 | [0.52; 0.53] |
| Farmer, 2016      | 9483  | 10799  | 0.88 | [0.87; 0.88] |
| Farr, 2014        | 55597 | 134961 | 0.41 | [0.41; 0.41] |
| Gatwood, 2018a    | 31747 | 47846  | 0.66 | [0.66; 0.67] |
| Gatwood, 2018b    | 29856 | 44446  | 0.67 | [0.67; 0.68] |
| Guenette, 2016    | 6     | 12     | 0.50 | [0.21; 0.79] |
| Horii, 2019       | 120   | 242    | 0.50 | [0.43; 0.56] |
| Kim, 2018         | 9324  | 28625  | 0.33 | [0.32; 0.33] |
| Koyanagi, 2016    | 100   | 123    | 0.81 | [0.73; 0.88] |
| Nishimura, 2019a  | 3859  | 4108   | 0.94 | [0.93; 0.95] |
| O'Shea, 2013      | 1458  | 2438   | 0.60 | [0.58; 0.62] |
| Quilliam, 2013    | 7389  | 9817   | 0.75 | [0.74; 0.76] |
| Ranashinge, 2018  | 36    | 78     | 0.46 | [0.35; 0.58] |
| Romagnoli, 2021   | 2600  | 6686   | 0.39 | [0.38; 0.40] |
| Saraiva, 2020     | 2     | 22     | 0.09 | [0.01; 0.29] |
| Saundankar, 2016  | 88468 | 131103 | 0.67 | [0.67; 0.68] |
| Tanabe, 2017      | 882   | 1764   | 0.50 | [0.48; 0.52] |
| Vichayanrat, 2013 | 832   | 1064   | 0.78 | [0.76; 0.81] |
| White, 2012       | 20    | 28     | 0.71 | [0.51; 0.87] |
| Wong, 2011        | 8680  | 9777   | 0.89 | [0.88; 0.89] |
| Total             |       | 477411 | 0.61 | [0.52; 0.70] |

Heterogeneity:  $\chi^2_{22} = 48360.5$  ( $P < .001$ ),  $I^2 = 100\%$

therapeutic\_class = a-glucosidase inhibitors

|                  |      |      |      |              |
|------------------|------|------|------|--------------|
| Balkhi, 2019     | 119  | 205  | 0.58 | [0.51; 0.65] |
| Horii, 2019      | 99   | 208  | 0.48 | [0.41; 0.55] |
| Koyanagi, 2016   | 25   | 65   | 0.38 | [0.27; 0.51] |
| Nishimura, 2019a | 3372 | 3763 | 0.90 | [0.89; 0.91] |
| Romagnoli, 2021  | 444  | 1723 | 0.26 | [0.24; 0.28] |
| Saundankar, 2016 | 492  | 1100 | 0.45 | [0.42; 0.48] |
| Tanabe, 2017     | 655  | 1081 | 0.61 | [0.58; 0.64] |
| Total            |      | 8145 | 0.53 | [0.36; 0.69] |

Heterogeneity:  $\chi^2_6 = 2766.8$  ( $P < .001$ ),  $I^2 = 100\%$

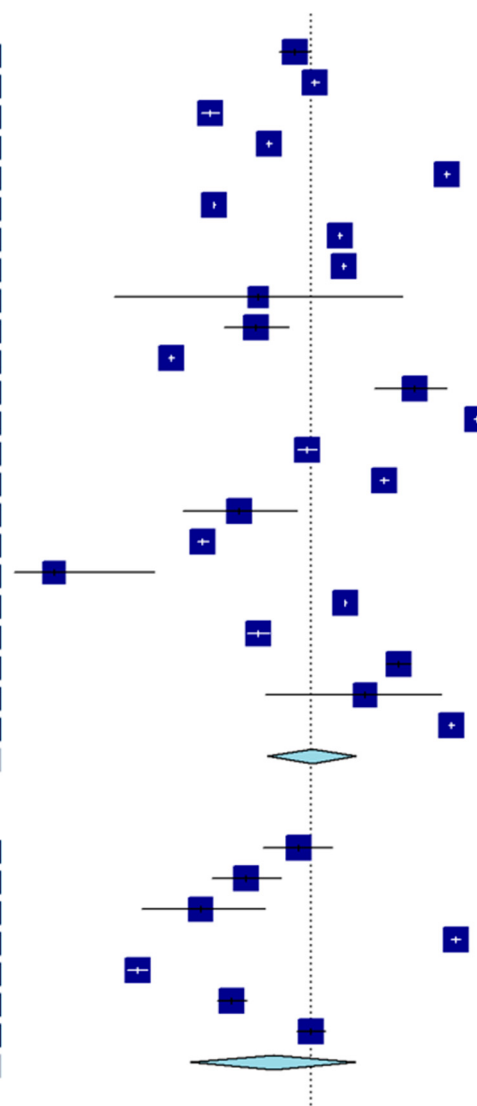

therapeutic\_class = TZDs

|                  |       |        |      |              |
|------------------|-------|--------|------|--------------|
| Balkhi, 2019     | 430   | 662    | 0.65 | [0.61; 0.69] |
| Chong, 2014      | 1383  | 2553   | 0.54 | [0.52; 0.56] |
| Farmer, 2016     | 8906  | 9765   | 0.91 | [0.91; 0.92] |
| Farr, 2014       | 15425 | 42012  | 0.37 | [0.36; 0.37] |
| Gatwood, 2018a   | 2329  | 3061   | 0.76 | [0.75; 0.78] |
| Gatwood, 2018b   | 2204  | 2863   | 0.77 | [0.75; 0.79] |
| Horii, 2019      | 55    | 130    | 0.42 | [0.34; 0.51] |
| Nishimura, 2019a | 1117  | 1244   | 0.90 | [0.88; 0.91] |
| Quilliam, 2013   | 6844  | 8962   | 0.76 | [0.75; 0.77] |
| Romagnoli, 2021  | 460   | 637    | 0.72 | [0.69; 0.76] |
| Sacks, 2013      | 4366  | 7212   | 0.61 | [0.59; 0.62] |
| Saundankar, 2016 | 30253 | 43608  | 0.69 | [0.69; 0.70] |
| Tanabe, 2017     | 309   | 592    | 0.52 | [0.48; 0.56] |
| Total            |       | 123301 | 0.68 | [0.58; 0.77] |

Heterogeneity:  $\chi^2_{12} = 19315.86$  ( $P < .001$ ),  $I^2 = 100\%$

therapeutic\_class = SGLT-2i

|                     |      |       |      |              |
|---------------------|------|-------|------|--------------|
| Bell, 2017          | 7361 | 13657 | 0.54 | [0.53; 0.55] |
| Buysman, 2017       | 1215 | 2261  | 0.54 | [0.52; 0.56] |
| Cai, 2016           | 1471 | 2925  | 0.50 | [0.48; 0.52] |
| Cai, 2017           | 4969 | 9633  | 0.52 | [0.51; 0.53] |
| Nishimura, 2019a    | 965  | 1168  | 0.83 | [0.80; 0.85] |
| Ofori-Asenso, 2019b | 7713 | 11981 | 0.64 | [0.64; 0.65] |
| Romagnoli, 2021     | 674  | 839   | 0.80 | [0.77; 0.83] |
| Singhal, 2019       | 356  | 750   | 0.47 | [0.44; 0.51] |
| Total               |      | 43214 | 0.61 | [0.51; 0.71] |

Heterogeneity:  $\chi^2_7 = 1126.69$  ( $P < .001$ ),  $I^2 = 99\%$

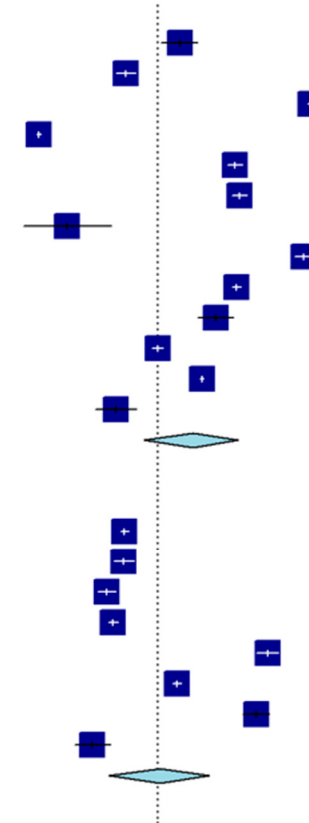

therapeutic\_class = DPP-4i

|                                                                        |         |       |              |              |
|------------------------------------------------------------------------|---------|-------|--------------|--------------|
| Balkhi, 2019                                                           | 770     | 1285  | 0.60         | [0.57; 0.63] |
| Cai, 2017                                                              | 3329    | 7796  | 0.43         | [0.42; 0.44] |
| Carls, 2017a                                                           | 242     | 652   | 0.37         | [0.33; 0.41] |
| Carls, 2017b                                                           | 784     | 2272  | 0.35         | [0.33; 0.37] |
| Farmer, 2016                                                           | 4871    | 5363  | 0.91         | [0.90; 0.92] |
| Farr, 2014                                                             | 29070   | 61399 | 0.47         | [0.47; 0.48] |
| Farr, 2016                                                             | 12362   | 27385 | 0.45         | [0.45; 0.46] |
| Horii, 2019                                                            | 165     | 301   | 0.55         | [0.49; 0.61] |
| Koyanagi, 2016                                                         | 119     | 148   | 0.80         | [0.73; 0.86] |
| Kurtyka, 2016                                                          | 4181    | 5890  | 0.71         | [0.70; 0.72] |
| Nigam, 2012                                                            | 4241    | 7306  | 0.58         | [0.57; 0.59] |
| Nishimura, 2019a                                                       | 30535   | 32155 | 0.95         | [0.95; 0.95] |
| Ofori-Asenso, 2019a                                                    | 10039   | 15915 | 0.63         | [0.62; 0.64] |
| Oh, 2020                                                               | 36250   | 37248 | 0.97         | [0.97; 0.97] |
| Rascati, 2017                                                          | 13040   | 26089 | 0.50         | [0.49; 0.51] |
| Romagnoli, 2021                                                        | 1373    | 1754  | 0.78         | [0.76; 0.80] |
| Sacks, 2013                                                            | 1064    | 1812  | 0.59         | [0.56; 0.61] |
| Saundankar, 2016                                                       | 5547    | 7681  | 0.72         | [0.71; 0.73] |
| Tanabe, 2017                                                           | 1488    | 1788  | 0.83         | [0.81; 0.85] |
| Total                                                                  | 244239  | 0.66  | [0.56; 0.75] |              |
| Heterogeneity: $\chi^2_{18} = 73084.72$ ( $P < .001$ ), $I^2 = 100\%$  |         |       |              |              |
| Total                                                                  | 1913586 | 0.61  | [0.56; 0.65] |              |
| Heterogeneity: $\chi^2_{99} = 320865.57$ ( $P < .001$ ), $I^2 = 100\%$ |         |       |              |              |
| Test for subgroup differences: $\chi^2_5 = 5.40$ ( $P = .37$ )         |         |       |              |              |

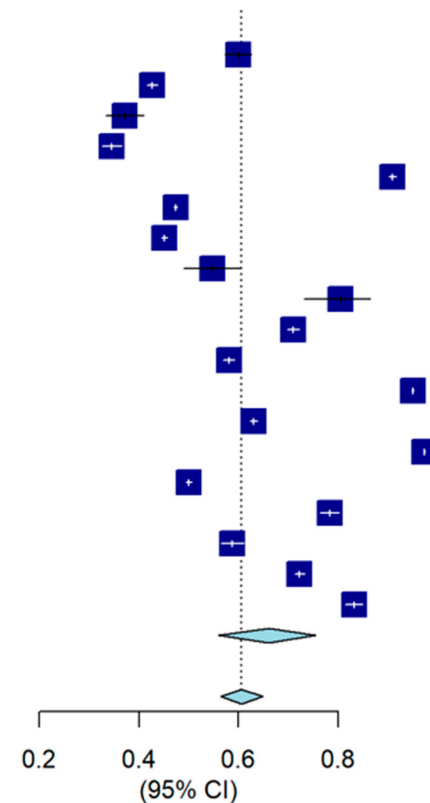

**Figure S7. Forest plot of proportions, and relative confidence intervals, of adherent patients stratified for therapeutic regimen complexity.**

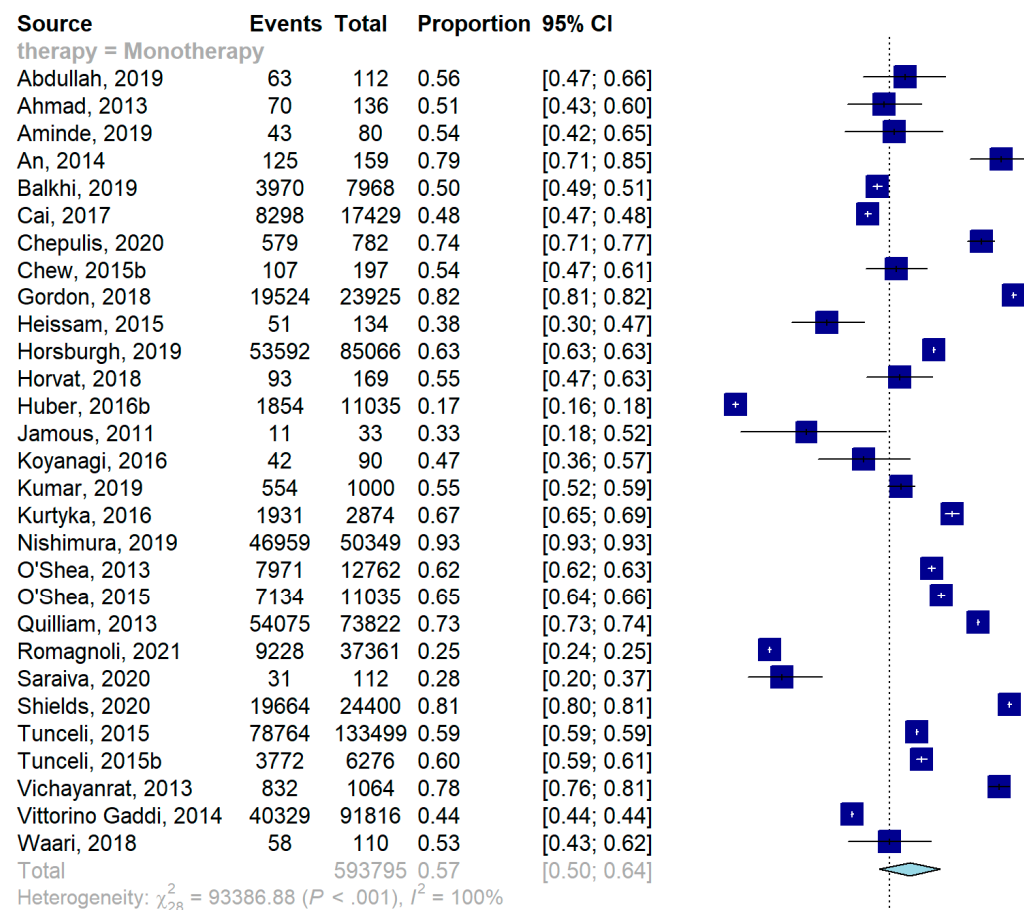

therapy = Combination

|                       |       |        |      |              |
|-----------------------|-------|--------|------|--------------|
| Abdullah, 2019        | 65    | 120    | 0.54 | [0.45; 0.63] |
| Ahmad, 2013           | 158   | 337    | 0.47 | [0.41; 0.52] |
| Aminde, 2019          | 26    | 54     | 0.48 | [0.34; 0.62] |
| An, 2014              | 347   | 449    | 0.77 | [0.73; 0.81] |
| Balkhi, 2019          | 180   | 410    | 0.44 | [0.39; 0.49] |
| Basak, 2014           | 3006  | 6043   | 0.50 | [0.48; 0.51] |
| Bloomgarden, 2017     | 10674 | 18560  | 0.58 | [0.57; 0.58] |
| Chepulis, 2020        | 379   | 501    | 0.76 | [0.72; 0.79] |
| Chew, 2015            | 224   | 385    | 0.58 | [0.53; 0.63] |
| Gordon, 2018          | 8023  | 9924   | 0.81 | [0.80; 0.82] |
| Heissam, 2015         | 22    | 217    | 0.10 | [0.06; 0.15] |
| Horvat, 2018          | 76    | 154    | 0.49 | [0.41; 0.58] |
| Jamous, 2011          | 39    | 97     | 0.40 | [0.30; 0.51] |
| Koyanagi, 2016        | 82    | 144    | 0.57 | [0.48; 0.65] |
| Kurtyka, 2016         | 2250  | 3016   | 0.75 | [0.73; 0.76] |
| Lokhandwala, 2016     | 12637 | 23361  | 0.54 | [0.53; 0.55] |
| Min, 2019             | 28005 | 49424  | 0.57 | [0.56; 0.57] |
| Nishimura, 2019b      | 6691  | 7524   | 0.89 | [0.88; 0.90] |
| O'Shea, 2013          | 2012  | 3196   | 0.63 | [0.61; 0.65] |
| Romagnoli, 2021       | 671   | 4102   | 0.16 | [0.15; 0.18] |
| Saraiva, 2020         | 23    | 138    | 0.17 | [0.11; 0.24] |
| Sicras-Mainar, 2014   | 507   | 987    | 0.51 | [0.48; 0.55] |
| Vittorino Gaddi, 2014 | 33499 | 51247  | 0.65 | [0.65; 0.66] |
| Vlacho, 2021          | 36118 | 75809  | 0.48 | [0.47; 0.48] |
| Waari, 2018           | 74    | 180    | 0.41 | [0.34; 0.49] |
| Zhu, 2015             | 683   | 7454   | 0.09 | [0.09; 0.10] |
| Total                 |       | 263833 | 0.51 | [0.42; 0.60] |

Heterogeneity:  $\chi^2_{25} = 24347.42$  ( $P < .001$ ),  $I^2 = 100\%$

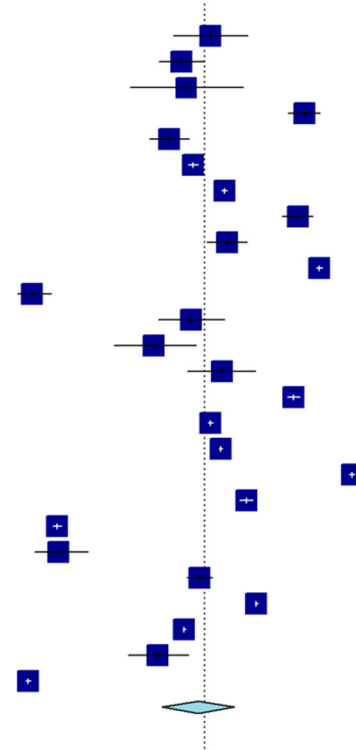

therapy = OADs + Insulin

|                      |       |       |      |              |
|----------------------|-------|-------|------|--------------|
| Abdullah, 2019       | 46    | 82    | 0.56 | [0.45; 0.67] |
| Acharya, 2019        | 15    | 39    | 0.38 | [0.23; 0.55] |
| Adisa, 2013          | 11    | 25    | 0.44 | [0.24; 0.65] |
| Afaya, 2020          | 42    | 50    | 0.84 | [0.71; 0.93] |
| Ahmad, 2013          | 34    | 84    | 0.40 | [0.30; 0.52] |
| Aminde, 2019         | 11    | 32    | 0.34 | [0.19; 0.53] |
| An, 2014             | 84    | 116   | 0.72 | [0.63; 0.80] |
| Arulmozhi, 2014      | 13    | 34    | 0.38 | [0.22; 0.56] |
| Ashur, 2015          | 208   | 324   | 0.64 | [0.59; 0.69] |
| Bonger, 2018         | 23    | 24    | 0.96 | [0.79; 1.00] |
| Chepulis, 2020       | 249   | 312   | 0.80 | [0.75; 0.84] |
| Elsous, 2017         | 25    | 43    | 0.58 | [0.42; 0.73] |
| Gatwood, 2018a       | 16577 | 24421 | 0.68 | [0.67; 0.68] |
| Horvat, 2018         | 25    | 35    | 0.71 | [0.54; 0.85] |
| Jarab, 2014          | 30    | 116   | 0.26 | [0.18; 0.35] |
| Lee, 2013            | 14    | 39    | 0.36 | [0.21; 0.53] |
| Leporini, 2016       | 44    | 151   | 0.29 | [0.22; 0.37] |
| Lo-Ciganic, 2016     | 252   | 862   | 0.29 | [0.26; 0.32] |
| Mirahmadizadeh, 2020 | 24    | 142   | 0.17 | [0.11; 0.24] |
| Mukherjee, 2013      | 75    | 173   | 0.43 | [0.36; 0.51] |
| Saraiva, 2020        | 14    | 50    | 0.28 | [0.16; 0.42] |
| Tandon, 2015         | 0     | 7     | 0.00 | [0.00; 0.41] |
| Waari, 2018          | 65    | 161   | 0.40 | [0.33; 0.48] |
| Total                |       | 27322 | 0.48 | [0.38; 0.58] |

Heterogeneity:  $\chi^2_{22} = 1111.56$  ( $P < .001$ ),  $I^2 = 98\%$

Total 884950 0.53

Heterogeneity:  $\chi^2_{77} = 121850.17$  ( $P < .001$ ),  $I^2 = 100\%$

Test for subgroup differences:  $\chi^2_2 = 2.53$  ( $P = .28$ )

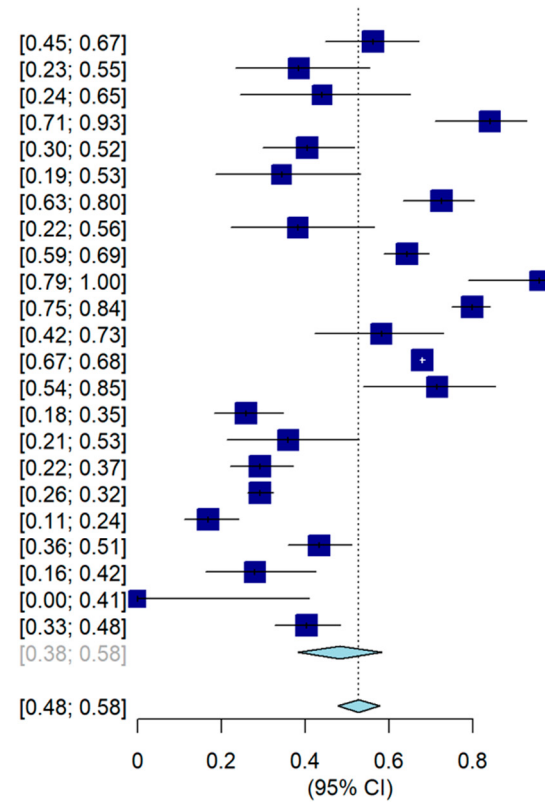

Figure S8. Forest plot of proportions, and relative confidence intervals, of adherent patients stratified for method of adherence measurement.

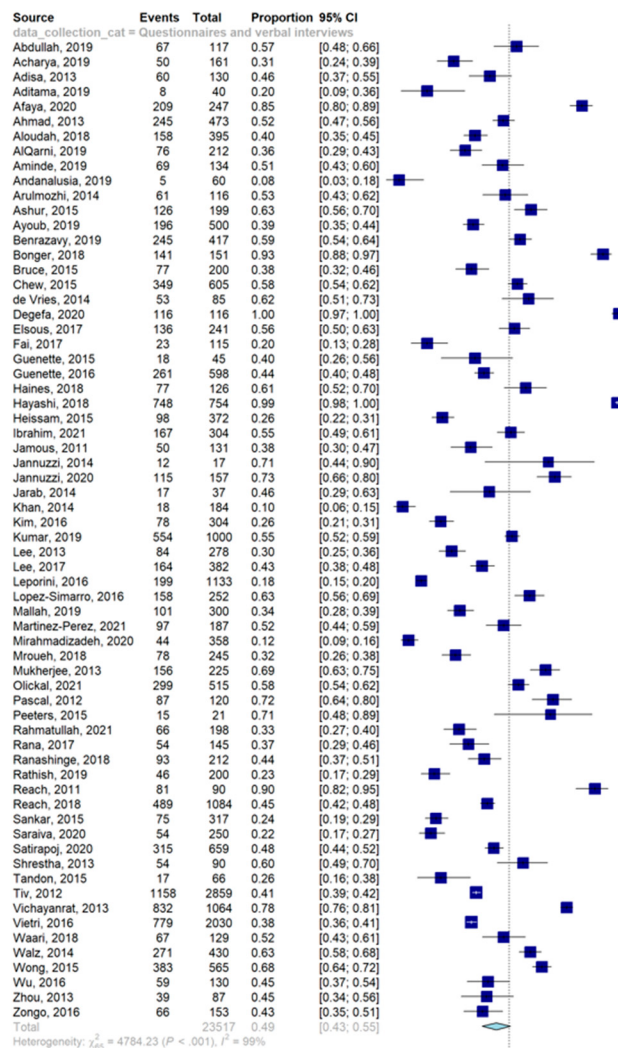

data\_collection\_cat = Administrative data and pill counting methods

|                                                                         |          |          |      |              |
|-------------------------------------------------------------------------|----------|----------|------|--------------|
| An, 2014                                                                | 388      | 492      | 0.79 | [0.75; 0.82] |
| Balkhi, 2019                                                            | 2652     | 5457     | 0.49 | [0.47; 0.50] |
| Basak, 2014                                                             | 3006     | 6043     | 0.50 | [0.48; 0.51] |
| Bell, 2017                                                              | 15746    | 27314    | 0.58 | [0.57; 0.58] |
| Bloomgarden, 2017                                                       | 10674    | 18560    | 0.58 | [0.57; 0.58] |
| Bryson, 2013                                                            | 313759   | 444418   | 0.71 | [0.70; 0.71] |
| Buytsman, 2017                                                          | 1215     | 2261     | 0.54 | [0.52; 0.56] |
| Cai, 2016                                                               | 1471     | 2925     | 0.50 | [0.48; 0.52] |
| Cai, 2017                                                               | 8298     | 17429    | 0.48 | [0.47; 0.48] |
| Carls, 2017a                                                            | 242      | 652      | 0.37 | [0.33; 0.41] |
| Carls, 2017b                                                            | 1878     | 4985     | 0.38 | [0.36; 0.39] |
| Chang, 2015                                                             | 184035   | 559864   | 0.33 | [0.33; 0.33] |
| Chen, 2013                                                              | 6307     | 11299    | 0.56 | [0.55; 0.57] |
| Chen, 2016                                                              | 6398     | 12123    | 0.53 | [0.52; 0.54] |
| Cheng, 2013                                                             | 6739     | 11580    | 0.58 | [0.57; 0.59] |
| Chepus, 2020                                                            | 1207     | 1595     | 0.76 | [0.73; 0.78] |
| Chong, 2014                                                             | 42756    | 75555    | 0.57 | [0.56; 0.57] |
| Dossa, 2015                                                             | 78321    | 100216   | 0.78 | [0.78; 0.78] |
| Farmer, 2016                                                            | 35529    | 40722    | 0.87 | [0.87; 0.88] |
| Farr, 2014                                                              | 100092   | 238372   | 0.42 | [0.42; 0.42] |
| Farr, 2016                                                              | 12362    | 27385    | 0.45 | [0.45; 0.46] |
| Garcia, 2019                                                            | 13       | 279      | 0.05 | [0.03; 0.08] |
| Gatwood, 2018a                                                          | 99430    | 159032   | 0.63 | [0.62; 0.63] |
| Gatwood, 2018b                                                          | 93928    | 148544   | 0.63 | [0.63; 0.63] |
| Gatwood, 2021                                                           | 58       | 433      | 0.13 | [0.10; 0.17] |
| Gordon, 2018                                                            | 27547    | 33849    | 0.81 | [0.81; 0.82] |
| Graetz, 2020                                                            | 79750    | 111463   | 0.72 | [0.71; 0.72] |
| Guenette, 2013                                                          | 93418    | 119832   | 0.78 | [0.78; 0.78] |
| Hagen, 2014                                                             | 2820     | 4978     | 0.57 | [0.55; 0.58] |
| Hansen, 2015                                                            | 1328     | 1848     | 0.72 | [0.70; 0.74] |
| Hedna, 2013                                                             | 123      | 205      | 0.60 | [0.53; 0.67] |
| Hong, 2014                                                              | 10550    | 23034    | 0.46 | [0.45; 0.46] |
| Horil, 2019                                                             | 440      | 884      | 0.50 | [0.46; 0.53] |
| Horsburgh, 2019                                                         | 53592    | 85066    | 0.63 | [0.63; 0.63] |
| Horvat, 2018                                                            | 128      | 272      | 0.47 | [0.41; 0.53] |
| Huber, 2016                                                             | 1854     | 11035    | 0.17 | [0.16; 0.18] |
| Iyengar, 2014                                                           | 82726    | 150493   | 0.55 | [0.55; 0.55] |
| Iyengar, 2016                                                           | 26805    | 40703    | 0.66 | [0.65; 0.66] |
| Jiang, 2020                                                             | 34242    | 58349    | 0.59 | [0.58; 0.59] |
| Khanjuli, 2019                                                          | 3246     | 7138     | 0.45 | [0.44; 0.47] |
| Kim, 2018                                                               | 22281    | 65067    | 0.34 | [0.34; 0.35] |
| Koyanagi, 2016                                                          | 320      | 452      | 0.71 | [0.66; 0.75] |
| Kurtyka, 2016                                                           | 4181     | 5890     | 0.71 | [0.70; 0.72] |
| Lo-Ciganic, 2015                                                        | 12589    | 33130    | 0.38 | [0.37; 0.39] |
| Lo-Ciganic, 2016                                                        | 6558     | 16256    | 0.40 | [0.40; 0.41] |
| Lokhandwala, 2016                                                       | 12637    | 23361    | 0.54 | [0.53; 0.55] |
| Manteuffel, 2014                                                        | 3391734  | 5141047  | 0.66 | [0.66; 0.66] |
| Mhatre, 2016                                                            | 4189     | 7028     | 0.60 | [0.58; 0.61] |
| Miller, 2015                                                            | 695      | 1998     | 0.35 | [0.33; 0.37] |
| Min, 2019                                                               | 28005    | 49424    | 0.57 | [0.56; 0.57] |
| Naffaa, 2020                                                            | 35085    | 113749   | 0.31 | [0.31; 0.31] |
| Nichols, 2016                                                           | 1890     | 2844     | 0.66 | [0.65; 0.68] |
| Nichols, 2018                                                           | 45218    | 54480    | 0.83 | [0.83; 0.83] |
| Nigam, 2012                                                             | 4241     | 7306     | 0.58 | [0.57; 0.59] |
| Nishimura, 2019a                                                        | 46959    | 50349    | 0.93 | [0.93; 0.93] |
| Nishimura, 2019b                                                        | 6691     | 7524     | 0.89 | [0.88; 0.90] |
| Ofori-Asenso, 2019a                                                     | 10039    | 15915    | 0.63 | [0.62; 0.64] |
| Ofori-Asenso, 2019b                                                     | 7713     | 11981    | 0.64 | [0.64; 0.65] |
| Oh, 2020                                                                | 36250    | 37248    | 0.97 | [0.97; 0.97] |
| O'Shea, 2013                                                            | 10644    | 15958    | 0.67 | [0.66; 0.67] |
| O'Shea, 2015                                                            | 7134     | 11035    | 0.65 | [0.64; 0.66] |
| Oung, 2017                                                              | 174      | 387      | 0.45 | [0.40; 0.50] |
| Quilliam, 2013                                                          | 54075    | 73822    | 0.73 | [0.73; 0.74] |
| Rascati, 2017                                                           | 13040    | 26089    | 0.50 | [0.49; 0.51] |
| Rinne, 2015                                                             | 29127    | 40766    | 0.71 | [0.71; 0.72] |
| Romagnoli, 2021                                                         | 9899     | 29952    | 0.33 | [0.33; 0.34] |
| Sacks, 2013                                                             | 32218    | 49642    | 0.65 | [0.64; 0.65] |
| Sacks, 2015                                                             | 6130     | 12771    | 0.48 | [0.47; 0.49] |
| Sattler, 2014                                                           | 84       | 243      | 0.35 | [0.29; 0.41] |
| Saundankar, 2016                                                        | 144216   | 238402   | 0.60 | [0.60; 0.61] |
| Schwab, 2019                                                            | 29733    | 38614    | 0.77 | [0.77; 0.77] |
| Shields, 2020                                                           | 19664    | 24400    | 0.81 | [0.80; 0.81] |
| Sicras-Mainar, 2014                                                     | 507      | 987      | 0.51 | [0.48; 0.55] |
| Simard, 2015                                                            | 107355   | 160231   | 0.67 | [0.67; 0.67] |
| Simard, 2018                                                            | 34890    | 52188    | 0.67 | [0.66; 0.67] |
| Simon-Tuval, 2018                                                       | 158      | 308      | 0.51 | [0.46; 0.57] |
| Singhal, 2019                                                           | 356      | 750      | 0.47 | [0.44; 0.51] |
| Taira, 2017                                                             | 3819     | 5163     | 0.74 | [0.73; 0.75] |
| Tanabe, 2017                                                            | 4420     | 7108     | 0.62 | [0.61; 0.63] |
| Tang, 2020                                                              | 48922    | 111186   | 0.44 | [0.44; 0.44] |
| Tunceli, 2015a                                                          | 78764    | 133499   | 0.59 | [0.59; 0.59] |
| Tunceli, 2015b                                                          | 3772     | 6276     | 0.60 | [0.59; 0.61] |
| Vittorino Gaddi, 2014                                                   | 73828    | 169375   | 0.44 | [0.43; 0.44] |
| Vlachos, 2021                                                           | 36118    | 75808    | 0.48 | [0.47; 0.48] |
| White, 2012                                                             | 44       | 60       | 0.73 | [0.60; 0.84] |
| Wong, 2011                                                              | 23997    | 26782    | 0.90 | [0.89; 0.90] |
| Wong, 2012                                                              | 313759   | 444418   | 0.71 | [0.70; 0.71] |
| Wong, 2014                                                              | 14068    | 26051    | 0.54 | [0.53; 0.55] |
| Zhu, 2015                                                               | 2269     | 24067    | 0.09 | [0.09; 0.10] |
| Zomahoun, 2016                                                          | 293      | 340      | 0.86 | [0.82; 0.90] |
| Total                                                                   | 10016411 | 10016411 | 0.55 | [0.51; 0.58] |
| Heterogeneity: $\chi^2_{80} = 667229.15$ ( $P < .001$ ), $I^2 = 100\%$  |          |          |      |              |
| Total                                                                   |          |          |      |              |
| Heterogeneity: $\chi^2_{110} = 673889.71$ ( $P < .001$ ), $I^2 = 100\%$ |          |          |      |              |
| Test for subgroup differences: $\chi^2_1 = 6.42$ ( $P = .01$ )          |          |          |      |              |

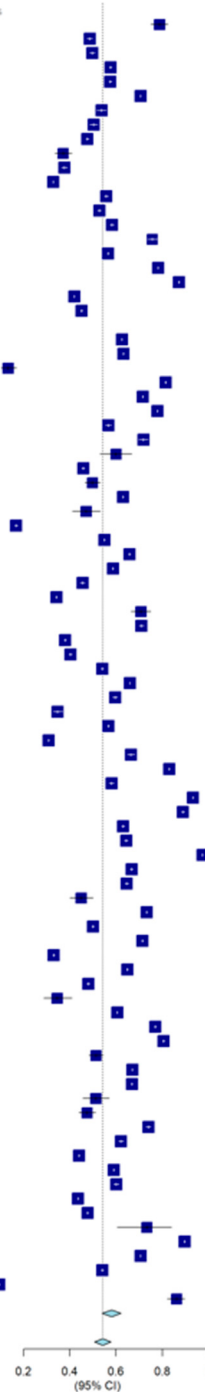

Supplement: Supplementary file 1 [file jcm-12-01981-s001.zip › jcm-2229937-supplementary.pdf]
